# Supplementary material
Source: PubMed Central journal article supplement (PMC7042864)
Supplement: jama-323-432-s003.pdf [file jama-323-432-s003.pdf]

## Supplementary Online Content

Wolf M, Rubin J, Achebe M, et al. Effects of iron isomaltoside vs ferric carboxymaltose on hypophosphatemia in iron-deficiency anemia: two randomized clinical trials [published February 4, 2020]. *JAMA*. doi:10.1001/jama.2019.22450

**eTable 1.** Inclusion and Exclusion Criteria, and Main Revisions to the Trial Protocols

**eTable 2.** Listing of All Secondary Safety and Efficacy End Points

**eTable 3.** Biochemical Assays

**eTable 4.** Prevalence of Hypophosphatemia at Each Time Point – Trial A, Trial B and Pooled Data for Trials A and B

**eTable 5.** Secondary and Additional Safety End Points – Trial A, Trial B, and Pooled Data for Trials A and B

**eTable 6.** Least Squares Mean Changes From Baseline in Biochemical and Bone Markers – Trial A, Trial B, and Pooled Data for Trials A and B

**eTable 7.** Secondary Efficacy End Points – Trial A, Trial B, and Pooled Data for Trial A and Trial B

**eFigure 1.** Incidence of Hypophosphatemia (Serum Phosphate <2.0 mg/dl) Overall and Prevalence of Hypophosphatemia at Each Time Point – Pooled Data for Trial A and Trial B

**eFigure 2.** Least Squares Mean Changes From Baseline in Biomarkers of Mineral and Bone Homeostasis According to Iron Treatment – Pooled Data for Trial A and Trial B

**eFigure 3.** Least Squares Mean Changes From Baseline in Iron Parameters – Pooled Data for Trial A and Trial B

**eFigure 4.** Changes in Bone Turnover Markers – Pooled Data for Trial A and Trial B

This supplementary material has been provided by the authors to give readers additional information about their work.

**eTable 1.** Inclusion and Exclusion Criteria, and Main Revisions to the Trial Protocols

| <b>Inclusion and exclusion criteria, and changes implemented during the trial conduct</b>                                                                                                                                                                                                                                                                                                                                                                                                                                                                                                                                                                                                                                                                                                                                                                                                                                                                                                                                                                                                                                                                                                                                                                                                                                                                                                                                                                                                                                                                                                                                                                                                                                                                                                                                                                                                                                                                                                                                                                                                                                                                                                                                                                                      |
|--------------------------------------------------------------------------------------------------------------------------------------------------------------------------------------------------------------------------------------------------------------------------------------------------------------------------------------------------------------------------------------------------------------------------------------------------------------------------------------------------------------------------------------------------------------------------------------------------------------------------------------------------------------------------------------------------------------------------------------------------------------------------------------------------------------------------------------------------------------------------------------------------------------------------------------------------------------------------------------------------------------------------------------------------------------------------------------------------------------------------------------------------------------------------------------------------------------------------------------------------------------------------------------------------------------------------------------------------------------------------------------------------------------------------------------------------------------------------------------------------------------------------------------------------------------------------------------------------------------------------------------------------------------------------------------------------------------------------------------------------------------------------------------------------------------------------------------------------------------------------------------------------------------------------------------------------------------------------------------------------------------------------------------------------------------------------------------------------------------------------------------------------------------------------------------------------------------------------------------------------------------------------------|
| <p><b>Inclusion criteria</b></p> <ol style="list-style-type: none"> <li>1. Men or women &gt;18 years with IDA caused by different etiologies,<sup>a</sup> such as abnormal uterine bleeding, gastrointestinal diseases, cancer, bariatric procedures (gastric bypass operations), and other conditions leading to significant blood loss.</li> <li>2. Hb ≤11 g/dl.</li> <li>3. Body weight &gt;50 kg.</li> <li>4. Serum ferritin ≤100 ng/ml.</li> <li>5. Estimated glomerular filtration rate ≥65 ml/min/1.73 m<sup>2</sup>.</li> <li>6. Serum phosphate &gt;2.5 mg/dl.</li> <li>7. Documented history of intolerance or unresponsiveness to oral iron therapy<sup>b</sup> for at least one month<sup>c</sup> prior to trial enrollment.</li> <li>8. Willingness to participate and signing the Informed Consent Form.</li> </ol>                                                                                                                                                                                                                                                                                                                                                                                                                                                                                                                                                                                                                                                                                                                                                                                                                                                                                                                                                                                                                                                                                                                                                                                                                                                                                                                                                                                                                                              |
| <p><b>Exclusion criteria</b></p> <ol style="list-style-type: none"> <li>1. Acute bleeding &gt;500 ml within 72 hours.</li> <li>2. Anaemia predominantly caused by factors other than IDA according to Investigator's judgment.</li> <li>3. Hemochromatosis or other iron storage disorders.</li> <li>4. Known hypersensitivity reaction to any component of IIM or FCM.</li> <li>5. Previous serious hypersensitivity reactions to any IV iron compounds.</li> <li>6. Treatment with IV iron within the last 30 days prior to screening.</li> <li>7. Treatment with erythropoietin or erythropoietin-stimulation agents, red blood cell transfusion, radiotherapy, and/or chemotherapy within the last 30 days prior to screening.</li> <li>8. Received an investigational drug within the last 30 days prior to screening.</li> <li>9. Planned surgical procedure within the trial period.</li> <li>10. Alanine aminotransferase and/or aspartate aminotransferase &gt;3 times upper limit of normal (e.g., decompensated liver cirrhosis or active hepatitis).</li> <li>11. Surgery under general anaesthesia within the last 30 days prior to screening.</li> <li>12. Any non-viral infection within the last 30 days prior to screening.</li> <li>13. Alcohol or drug abuse within the past 6 months.</li> <li>14. Untreated hyperparathyroidism.</li> <li>15. Kidney transplantation.</li> <li>16. Estimated life expectancy of &lt;6 months or, for cancer patients, an Eastern Cooperative Oncology Group (ECOG) performance status &gt;1.</li> <li>17. Conditions that interfere with the subject's ability to understand the requirements of the trial and/or presumable non-compliance.</li> <li>18. Any other laboratory abnormality, medical condition, or psychiatric disorders which, in the opinion of the Investigator, will put the subject's disease management at risk or may result in the subject being unable to comply with the trial requirements.</li> <li>19. Pregnant or nursing women. In order to avoid pregnancy, women of childbearing potential have to use adequate contraception (e.g., intrauterine devices, hormonal contraceptives, or double barrier method) during the entire trial period and 7 days after the last dosing.</li> </ol> |
| <p><b>Main revisions made to the trial protocols</b></p> <p>The original protocols were amended once during the trials. Besides minor editing and administrative changes, the following amendments were made to the original protocol:</p> <ul style="list-style-type: none"> <li>• Text was updated to show that alkaline phosphatase was measured in serum and not in plasma.</li> <li>• The pyridinoline test – an exploratory end point with limited value – was omitted.</li> <li>• Exclusion criteria changes: Surgery under anesthesia was changed to surgery under general anesthesia; measurement of vitamin D prior to IV iron treatment was deleted as this is not standard; exclusion of oncology patients was a mistake and therefore this exclusion criterion was replaced with an inclusion criterion of life expectancy of at least 6 months; and psychological illness or seizures were omitted since neither were contraindicated or warned of in the prescribing information.</li> </ul>                                                                                                                                                                                                                                                                                                                                                                                                                                                                                                                                                                                                                                                                                                                                                                                                                                                                                                                                                                                                                                                                                                                                                                                                                                                                    |

**Main revisions made to the trial protocols (continued)**

- “Documented history” was defined with the subject’s own description of their illness deemed adequate to be entered in the medical file as source. Thus, no medical files from the referring physician or other were considered necessary.
- Prohibited medications and non-drug therapies – erythropoietin or erythropoietin-stimulation agents, radiotherapy, and chemotherapy – were clarified as prohibited by alignment with exclusion criteria and prohibited medications.
- Functional team positions within two internal teams – the TCT and GCP Quality Steering Committee – were expanded to reflect the updated team constitutions.
- The description of trial summary data for posting in public registries was simplified to reflect updated requirements of the FDA “Final Rule”.

<sup>a</sup> The etiology for IDA was documented in the medical history and verified in the source documents; if the etiology was unknown, this was also documented.

<sup>b</sup> Intolerance and non-response to oral iron treatment, along with the accompanying signs and symptoms, were documented in the medical history and verified in the source documents.

<sup>c</sup> Intolerance or unresponsiveness to  $\geq 1$  month of prescribed oral iron therapy according to the Investigator’s judgment within the last 9 months was documented; these patients would not be candidates for oral iron again.

GCP, Good Clinical Practice; Hb, hemoglobin; FCM, ferric carboxymaltose; IDA, iron deficiency anemia; IIM iron isomaltoside 1000/ferric derisomaltose; IV, intravenous; TCT, Trial Core Team.

**eTable 2.** Listing of All Secondary Safety and Efficacy End Points

| Secondary end point                                                                            | Reported in manuscript? |
|------------------------------------------------------------------------------------------------|-------------------------|
| <b>Safety end points<sup>a</sup></b>                                                           |                         |
| Proportion of patients with hypophosphatemia at day 35                                         | Yes                     |
| Absolute change in serum phosphate from baseline to days 1, 7, 8, 14, 21, and 35               | Yes                     |
| Relative change in serum phosphate from baseline to days 1, 7, 8, 14, 21, and 35               | No                      |
| Change in fractional urinary phosphate excretion from baseline to days 1, 7, 8, 14, 21, and 35 | Yes                     |
| Change in intact fibroblast growth factor 23 from baseline to days 1, 7, 8, 14, 21, and 35     | Yes                     |
| Change in C-terminal fibroblast growth factor 23 from baseline to days 1, 7, 8, 14, 21, and 35 | Yes                     |
| Change in 1,25-Dihydroxyvitamin D from baseline to days 1, 7, 8, 14, 21, and 35                | Yes                     |
| Change in 24,25-Dihydroxyvitamin D from baseline to days 1, 7, 8, 14, 21, and 35               | Yes                     |
| Change in 25-Hydroxyvitamin D from baseline to days 1, 7, 8, 14, 21, and 35                    | Yes                     |
| Change in ionized calcium from baseline to days 1, 7, 8, 14, 21, and 35                        | Yes                     |
| Change in intact parathyroid hormone from baseline to days 1, 7, 8, 14, 21, and 35             | Yes                     |
| Incidence of serum phosphate <1.0 mg/dl at any time from baseline to day 35                    | Yes <sup>b</sup>        |
| Time with hypophosphatemia (serum phosphate <2.0 mg/dl) from baseline to day 35                | No                      |
| Type and incidence of adverse events                                                           | Yes                     |
| Serious or severe hypersensitivity reactions (i.e., treatment-emergent)                        | Yes                     |
| <b>Efficacy end points</b>                                                                     |                         |
| Change in hemoglobin per gram of iron from baseline to days 1, 7, 8, 14, 21, and 35            | Yes                     |
| Change in ferritin from baseline to days 1, 7, 8, 14, 21, and 35                               | Yes                     |
| Change in transferrin saturation from baseline to days 1, 7, 8, 14, 21, and 35                 | Yes                     |

<sup>a</sup>In addition, physical examinations and measurements of vital signs, height, weight, electro-cardiogram, and safety laboratory parameters were measured as part of standard safety assessments.

<sup>b</sup>The pre-specified secondary endpoint for severe hypophosphatemia was <1.0 mg/dl, whereas ≤1.0 mg/dl is reported in the manuscript. This modification of the definition of severe hypophosphatemia was enacted to account for rounding of values measured in mmol/l to two decimal places, into mg/dl reported to one decimal place, which caused values of 0.99 mg/dl (0.32 mmol/l) to be rounded to equal to rather than less than 1.0 mg/dl.

**eTable 3. Biochemical Assays**

| Biochemical/<br>bone marker              | Assay                                  | Manufacturer                          | Precision (%CV)            |                            |
|------------------------------------------|----------------------------------------|---------------------------------------|----------------------------|----------------------------|
|                                          |                                        |                                       | Intra-<br>assay            | Inter-<br>assay            |
| Hemoglobin                               | Flow cytometry                         | Siemens ADVIA 2120i Hematology System | 0.9–1.1                    | 0.9–1.8                    |
| Serum phosphate                          | Photometric analysis                   | Roche Diagnostics                     | 0.5–0.9                    | 1.2–1.4                    |
| Urine phosphorus                         | Colorimetric                           | Roche Cobas 8000 Modular Analyzer     | 0.5–0.8                    | 1.3–1.4                    |
| Ferritin                                 | Chemiluminescence immunoassay          | Beckman Coulter Inc.                  | 2.6–3.9                    | 4.1–6.3                    |
| Transferrin                              | Chemiluminescence immunoassay          | Siemens BNII Nephelometer             | 2.7                        | 2.3                        |
| Serum creatinine                         | Automated clinical chemistry           | Roche Cobas 8000 Modular Analyzer     | 0.9–2.5                    | 1.7–3.7                    |
| Urine creatinine                         | Colorimetric                           | Roche Cobas 8000 Modular Analyzer     | 1.1–2.1                    | 1.7–2.2                    |
| IntactFGF23                              | ELISA                                  | Immutopics, Inc.                      | 2.0–4.1                    | 3.5–9.1                    |
| C-terminal FGF23                         | ELISA                                  | Immutopics, Inc.                      | 1.4–2.4                    | 2.4–4.7                    |
| 25-Hydroxyvitamin D                      | LC-MS/MS                               | SCIEX                                 | D2: 2.5–3.1<br>D3: 1.5–4.0 | D2: 2.9–5.4<br>D3: 2.8–4.4 |
| 1,25-Dihydroxyvitamin D                  | Chemiluminescence immunoassay          | DiaSorin                              | 3.5–7.8                    | 3.6–6.6                    |
| 24,25-Dihydroxyvitamin D                 | LC-MS/MS                               | Danaher-SCIEX API5000                 | D2: 2.3–5.9<br>D3: 3.1–7.8 | D2: 3.3–6.2<br>D3: 3.0–6.5 |
| Ionized calcium                          | Ion-selective electrode                | Instrumentation Laboratory            | Not specified              | Not specified              |
| Intactparathyroid hormone                | Chemiluminescence immunoassay          | Siemens Healthcare Diagnostics        | 3.4–5.2                    | 1.5–5.8                    |
| Alkaline phosphatase                     | Photometric analysis                   | Roche Diagnostics                     | 0.4–0.5                    | 0.67                       |
| Bone-specific alkaline phosphatase       | Chemiluminescence immunoassay          | Beckman Coulter Inc.                  | 1.5–2.6                    | 3.6–6.4                    |
| N-terminal propeptide of Type I collagen | Electrochemiluminescence immunoassay   | Roche Diagnostics                     | 1.6–2.1                    | 4.2–4.4                    |
| Carboxy-terminal collagen crosslinks     | Elecsys $\beta$ -CrossLaps serum assay | Roche Diagnostics                     | 1.3–2.3                    | 4.6–6.5                    |

Urinary fractional excretion of phosphate was calculated as:  $[\text{urinary phosphate} \times \text{serum creatinine}] / [\text{serum phosphate} \times \text{urinary creatinine}] \times 100$ . Transferrin saturation was calculated as:  $[\text{total serum iron} (\mu\text{mol/l}) \times 5.586] / [\text{transferrin} (\text{g/l}) \times 100] \times 70.9$ .

CV, coefficient of variation; ELISA, enzyme-linked immunosorbent assay; FGF23, fibroblast growth factor; LC-MS/MS, liquid chromatography and tandem mass spectrometry.

**eTable 4.** Prevalence of Hypophosphatemia at Each Time Point – Trial A, Trial B and Pooled Data for Trials A and B

|                                                                              | Day                  |                                  |                         |                         |                         |                         |                                      |
|------------------------------------------------------------------------------|----------------------|----------------------------------|-------------------------|-------------------------|-------------------------|-------------------------|--------------------------------------|
|                                                                              | 0<br>n/N (%)         | 1<br>n/N (%)                     | 7<br>n/N (%)            | 8<br>n/N (%)            | 14<br>n/N (%)           | 21<br>n/N (%)           | 35<br>n/N (%)                        |
| <b>Trial A</b>                                                               |                      |                                  |                         |                         |                         |                         |                                      |
| IIM                                                                          | 0/63 (0.0)           | 0/59 (0.0)                       | 2/60 (3.3)              | 3/57 (5.3)              | 1/58 (1.7)              | 1/54 (1.9)              | 1/59 (1.7)                           |
| FCM                                                                          | 0/60 (0.0)           | 1/56 (1.8)                       | 24/58 (41.4)            | 24/57 (42.1)            | 38/56 (67.9)            | 28/56 (50.0)            | 24/58 (41.4)                         |
| Rate difference<br>(95% CI)                                                  | –                    | –1.8<br>(–5.3, 1.7) <sup>a</sup> | –37.9<br>(–50.9, –22.9) | –36.2<br>(–49.6, –20.9) | –65.9<br>(–76.8, –48.9) | –47.2<br>(–60.1, –30.0) | –39.2<br>(–52.2, –23.3)              |
| <i>P</i> value                                                               | –                    | <i>P</i> = .30                   | <i>P</i> < .001                      |
| Rate difference, overall<br>incidence (95% CI)                               | –67.0 (–77.4, –51.5) |                                  |                         |                         |                         |                         |                                      |
| <i>P</i> value                                                               | <i>P</i> < .001      |                                  |                         |                         |                         |                         |                                      |
| Site-adjusted rate<br>difference, overall<br>incidence (95% CI) <sup>b</sup> | –67.5 (–78.5, –49.8) |                                  |                         |                         |                         |                         |                                      |
| <i>P</i> value                                                               | <i>P</i> < .001      |                                  |                         |                         |                         |                         |                                      |
| <b>Trial B</b>                                                               |                      |                                  |                         |                         |                         |                         |                                      |
| IIM                                                                          | 0/62 (0.0)           | 0/61 (0.0)                       | 2/60 (3.3)              | 3/59 (5.1)              | 3/58 (5.2)              | 1/56 (1.8)              | 0/58 (0.0)                           |
| FCM                                                                          | 0/57 (0.0)           | 0/53 (0.0)                       | 14/55 (25.5)            | 22/53 (41.5)            | 33/53 (62.3)            | 28/55 (50.9)            | 25/56 (44.6)                         |
| Rate difference<br>(95% CI)                                                  | –                    | –                                | –22.0<br>(–35.1, –7.5)  | –38.4<br>(–52.2, –22.5) | –57.1<br>(–69.5, –40.3) | –48.6<br>(–61.4, –31.6) | –44.6<br>(–57.7, –31.6) <sup>a</sup> |
| <i>P</i> value                                                               | –                    | –                                | <i>P</i> < .001                      |
| Rate difference, overall<br>incidence (95% CI)                               | –65.8 (–76.6, –49.8) |                                  |                         |                         |                         |                         |                                      |
| <i>P</i> value                                                               | <i>P</i> < .001      |                                  |                         |                         |                         |                         |                                      |
| Site-adjusted rate<br>difference, overall<br>incidence (95% CI) <sup>b</sup> | –69.2 (–79.8, –51.3) |                                  |                         |                         |                         |                         |                                      |
| <i>P</i> value                                                               | <i>P</i> < .001      |                                  |                         |                         |                         |                         |                                      |

|                                                                              | Day                  |                                  |                         |                         |                         |                         |                         |
|------------------------------------------------------------------------------|----------------------|----------------------------------|-------------------------|-------------------------|-------------------------|-------------------------|-------------------------|
|                                                                              | 0<br>n/N (%)         | 1<br>n/N (%)                     | 7<br>n/N (%)            | 8<br>n/N (%)            | 14<br>n/N (%)           | 21<br>n/N (%)           | 35<br>n/N (%)           |
| <b>Pooled data for Trial A and Trial B</b>                                   |                      |                                  |                         |                         |                         |                         |                         |
| IIM                                                                          | 0/125 (0.0)          | 0/120 (0.0)                      | 4/120 (3.3)             | 6/116 (5.2)             | 4/116 (3.4)             | 2/110 (1.8)             | 1/117 (0.9)             |
| FCM                                                                          | 0/117 (0.0)          | 1/109 (0.9)                      | 38/113 (33.6)           | 46/110 (41.8)           | 71/109 (65.1)           | 56/111 (50.5)           | 49/114 (43.0)           |
| Rate difference<br>(95% CI)                                                  | –                    | –0.9<br>(–2.7, 0.9) <sup>a</sup> | –30.1<br>(–39.5, –20.5) | –37.3<br>(–47.1, –26.8) | –61.5<br>(–70.1, –50.8) | –48.1<br>(–57.4, –37.4) | –41.7<br>(–50.9, –31.1) |
| <i>P</i> value                                                               | –                    | <i>P</i> = .29                   | <i>P</i> < .001         |
| Rate difference, overall<br>incidence (95% CI)                               | –66.4 (–74.4, –55.8) |                                  |                         |                         |                         |                         |                         |
| <i>P</i> value                                                               | <i>P</i> < .001      |                                  |                         |                         |                         |                         |                         |
| Site-adjusted rate<br>difference, overall<br>incidence (95% CI) <sup>b</sup> | –68.3 (–76.5, –56.5) |                                  |                         |                         |                         |                         |                         |
| <i>P</i> value                                                               | <i>P</i> < .001      |                                  |                         |                         |                         |                         |                         |

Data are presented for the safety analysis set. *P* values are for between-group comparisons. Rate differences with 95% Newcombe CI adjusted for stratum (and trial, in the pooled analyses) using the Cochran-Mantel-Haenszel method, unless otherwise stated. <sup>a</sup> Rate difference with 95% Newcombe CI adjusted for stratum (and trial, in the pooled analyses) using the Cochran-Mantel-Haenszel method could not be estimated due to lack of events. Unadjusted treatment difference and 95% CI presented. <sup>b</sup> Rate difference with 95% Newcombe CI adjusted for site using the Cochran-Mantel-Haenszel method (*post-hoc* analysis).

CI, confidence interval; FCM, ferric carboxymaltose; FGF, fibroblast growth factor; IIM, iron isomaltoside 1000/ferric derisomaltose.

**eTable 5.** Secondary and Additional Safety End Points – Trial A, Trial B, and Pooled Data for Trials A and B

| End point                                     |          | Day                     |                         |                        |                         |                         |                        |                        |
|-----------------------------------------------|----------|-------------------------|-------------------------|------------------------|-------------------------|-------------------------|------------------------|------------------------|
|                                               |          | 0                       | 1                       | 7                      | 8                       | 14                      | 21                     | 35                     |
|                                               |          | Mean (SD)<br>n          | Mean (SD)<br>n          | Mean (SD)<br>n         | Mean (SD)<br>n          | Mean (SD)<br>n          | Mean (SD)<br>n         | Mean (SD)<br>n         |
| <b>Trial A</b>                                |          |                         |                         |                        |                         |                         |                        |                        |
| Serum phosphate (mg/dl)                       | IIM      | 3.3 (0.6)<br>(n=63)     | 3.6 (0.5)<br>(n=59)     | 3.2 (0.6)<br>(n=60)    | 3.2 (0.6)<br>(n=57)     | 3.2 (0.6)<br>(n=58)     | 3.4 (0.6)<br>(n=54)    | 3.5 (0.6)<br>(n=59)    |
|                                               | FCM      | 3.3 (0.5)<br>(n=60)     | 3.1 (0.5)<br>(n=56)     | 2.2 (0.5)<br>(n=58)    | 2.2 (0.6)<br>(n=57)     | 1.9 (0.8)<br>(n=56)     | 2.3 (1.0)<br>(n=56)    | 2.4 (0.9)<br>(n=58)    |
|                                               | <i>P</i> | –                       | <i>P</i> < .001         | <i>P</i> < .001        | <i>P</i> < .001         | <i>P</i> < .001         | <i>P</i> < .001        | <i>P</i> < .001        |
| Urinary fractional excretion of phosphate (%) | IIM      | 11.1 (6.7)<br>(n=40)    | 10.3 (6.4)<br>(n=41)    | 11.8 (5.7)<br>(n=43)   | 12.1 (6.7)<br>(n=40)    | 11.1 (5.8)<br>(n=44)    | 11.6 (6.5)<br>(n=42)   | 10.3 (4.7)<br>(n=49)   |
|                                               | FCM      | 10.3 (4.7)<br>(n=42)    | 12.8 (5.0)<br>(n=40)    | 18.8 (8.2)<br>(n=42)   | 19.4 (9.4)<br>(n=42)    | 21.8 (11.3)<br>(n=46)   | 18.7 (10.2)<br>(n=47)  | 15.2 (9.2)<br>(n=48)   |
|                                               | <i>P</i> | –                       | <i>P</i> < .001         | <i>P</i> < .001        | <i>P</i> < .001         | <i>P</i> < .001         | <i>P</i> < .001        | <i>P</i> = .001        |
| Intact FGF23 (pg/ml)                          | IIM      | 59.0 (39.8)<br>(n=59)   | 61.1 (58.2)<br>(n=58)   | 69.0 (44.4)<br>(n=60)  | 64.2 (32.4)<br>(n=54)   | 51.2 (40.4)<br>(n=57)   | 56.0 (49.1)<br>(n=54)  | 48.2 (26.1)<br>(n=58)  |
|                                               | FCM      | 46.2 (20.5)<br>(n=57)   | 151.2 (90.1)<br>(n=55)  | 118.1 (79.7)<br>(n=56) | 343.6 (257.7)<br>(n=56) | 151.0 (111.4)<br>(n=56) | 111.9 (94.2)<br>(n=55) | 79.0 (62.3)<br>(n=57)  |
|                                               | <i>P</i> | –                       | <i>P</i> < .001         | <i>P</i> < .001        | <i>P</i> < .001         | <i>P</i> < .001         | <i>P</i> < .001        | <i>P</i> < .001        |
| C-terminal FGF23 (RU/ml)                      | IIM      | 847.1 (811.6)<br>(n=60) | 137.7 (72.3)<br>(n=57)  | 119.1 (41.1)<br>(n=55) | 129.6 (93.3)<br>(n=55)  | 107.2 (39.0)<br>(n=57)  | 105.0 (47.3)<br>(n=51) | 109.2 (44.9)<br>(n=53) |
|                                               | FCM      | 631.2 (672.6)<br>(n=55) | 218.0 (122.1)<br>(n=53) | 161.6 (72.9)<br>(n=55) | 304.3 (172.4)<br>(n=55) | 193.6 (128.8)<br>(n=55) | 138.6 (64.7)<br>(n=53) | 122.2 (58.2)<br>(n=57) |
|                                               | <i>P</i> | –                       | <i>P</i> < .001         | <i>P</i> < .001        | <i>P</i> < .001         | <i>P</i> < .001         | <i>P</i> < .001        | <i>P</i> = .14         |
| 1,25-Dihydroxyvitamin D (pg/ml)               | IIM      | 58.9 (18.2)<br>(n=62)   | 63.2 (23.9)<br>(n=59)   | 39.2 (18.4)<br>(n=60)  | 42.4 (19.0)<br>(n=58)   | 55.2 (14.0)<br>(n=58)   | 55.8 (15.5)<br>(n=56)  | 55.2 (16.3)<br>(n=59)  |
|                                               | FCM      | 63.9 (19.4)<br>(n=60)   | 43.3 (17.2)<br>(n=58)   | 25.1 (21.0)<br>(n=58)  | 24.4 (25.3)<br>(n=58)   | 24.9 (22.4)<br>(n=57)   | 34.9 (28.4)<br>(n=56)  | 46.0 (23.4)<br>(n=58)  |
|                                               | <i>P</i> | –                       | <i>P</i> < .001         | <i>P</i> < .001        | <i>P</i> < .001         | <i>P</i> < .001         | <i>P</i> < .001        | <i>P</i> = .004        |
| 24,25-Dihydroxyvitamin D (ng/ml)              | IIM      | 2.1 (1.1)<br>(n=61)     | 2.1 (0.9)<br>(n=59)     | 2.4 (1.2)<br>(n=60)    | 2.3 (1.2)<br>(n=58)     | 2.2 (1.1)<br>(n=58)     | 2.2 (1.3)<br>(n=56)    | 2.2 (1.2)<br>(n=59)    |
|                                               | FCM      | 2.4 (1.2)<br>(n=56)     | 2.5 (1.3)<br>(n=58)     | 3.2 (1.6)<br>(n=58)    | 3.2 (1.6)<br>(n=58)     | 3.5 (1.6)<br>(n=56)     | 3.3 (1.5)<br>(n=55)    | 3.1 (1.5)<br>(n=58)    |
|                                               | <i>P</i> | –                       | <i>P</i> = .06          | <i>P</i> = .002        | <i>P</i> < .001         | <i>P</i> < .001         | <i>P</i> < .001        | <i>P</i> = .001        |



| End point                                              |          | Day                   |                       |                       |                       |                       |                       |                       |
|--------------------------------------------------------|----------|-----------------------|-----------------------|-----------------------|-----------------------|-----------------------|-----------------------|-----------------------|
|                                                        |          | 0                     | 1                     | 7                     | 8                     | 14                    | 21                    | 35                    |
|                                                        |          | Mean (SD)<br>n        |
| <b>Trial A (continued)</b>                             |          |                       |                       |                       |                       |                       |                       |                       |
| 25-Hydroxyvitamin D (ng/ml)                            | IIM      | 23.2 (7.6)<br>(n=62)  | 23.7 (7.4)<br>(n=59)  | 24.5 (7.9)<br>(n=60)  | 23.9 (7.8)<br>(n=58)  | 24.2 (8.0)<br>(n=58)  | 24.2 (8.2)<br>(n=55)  | 23.4 (8.1)<br>(n=59)  |
|                                                        | FCM      | 25.9 (7.8)<br>(n=60)  | 26.2 (8.0)<br>(n=58)  | 25.3 (8.2)<br>(n=57)  | 26.2 (8.3)<br>(n=58)  | 25.1 (8.5)<br>(n=57)  | 25.5 (7.6)<br>(n=57)  | 26.0 (6.5)<br>(n=56)  |
|                                                        | <i>P</i> | –                     | <i>P</i> = .56        | <i>P</i> = .01        | <i>P</i> = .61        | <i>P</i> = .04        | <i>P</i> = .24        | <i>P</i> = .83        |
| Ionized calcium (mg/dl)                                | IIM      | 5.08 (0.21)<br>(n=59) | 5.12 (0.22)<br>(n=56) | 5.10 (0.19)<br>(n=55) | 5.11 (0.20)<br>(n=54) | 5.09 (0.22)<br>(n=56) | 5.13 (0.20)<br>(n=54) | 5.10 (0.24)<br>(n=51) |
|                                                        | FCM      | 5.08 (0.21)<br>(n=60) | 5.08 (0.23)<br>(n=56) | 5.02 (0.17)<br>(n=56) | 5.05 (0.20)<br>(n=56) | 5.00 (0.20)<br>(n=53) | 5.03 (0.23)<br>(n=50) | 5.05 (0.24)<br>(n=55) |
|                                                        | <i>P</i> | –                     | <i>P</i> = .27        | <i>P</i> = .004       | <i>P</i> = .05        | <i>P</i> = .005       | <i>P</i> = .006       | <i>P</i> = .13        |
| Intact parathyroid hormone (pg/ml)                     | IIM      | 55.1 (26.4)<br>(n=62) | 52.8 (25.6)<br>(n=57) | 50.8 (27.6)<br>(n=58) | 55.7 (32.4)<br>(n=55) | 59.5 (33.9)<br>(n=55) | 54.6 (29.4)<br>(n=53) | 55.5 (28.3)<br>(n=54) |
|                                                        | FCM      | 51.6 (26.4)<br>(n=59) | 54.1 (23.5)<br>(n=54) | 58.5 (29.7)<br>(n=57) | 54.8 (28.7)<br>(n=56) | 68.3 (37.5)<br>(n=57) | 68.0 (34.7)<br>(n=56) | 72.7 (45.2)<br>(n=57) |
|                                                        | <i>P</i> | –                     | <i>P</i> = .74        | <i>P</i> = .04        | <i>P</i> = .92        | <i>P</i> = .06        | <i>P</i> < .001       | <i>P</i> = .003       |
| Alkaline phosphatase (IU/l)<br>(exploratory end point) | IIM      | 70.0 (26.9)<br>(n=62) | 70.3 (25.8)<br>(n=59) | 72.1 (22.4)<br>(n=60) | 72.7 (21.7)<br>(n=57) | 71.5 (22.0)<br>(n=57) | 71.3 (21.0)<br>(n=56) | 73.5 (25.4)<br>(n=59) |
|                                                        | FCM      | 72.4 (27.5)<br>(n=58) | 72.1 (30.6)<br>(n=54) | 74.6 (28.2)<br>(n=58) | 78.8 (30.9)<br>(n=58) | 78.6 (32.0)<br>(n=56) | 81.9 (30.0)<br>(n=56) | 81.9 (31.0)<br>(n=58) |
|                                                        | <i>P</i> | –                     | <i>P</i> = .96        | <i>P</i> = .69        | <i>P</i> = .14        | <i>P</i> = .13        | <i>P</i> = .005       | <i>P</i> = .03        |
| N-terminal propeptide of Type I<br>collagen (ng/ml)    | IIM      | 56.5 (26.3)<br>(n=62) | 55.0 (27.4)<br>(n=59) | 48.4 (21.5)<br>(n=60) | 48.7 (21.1)<br>(n=58) | 51.2 (25.6)<br>(n=58) | 53.4 (23.2)<br>(n=56) | 53.8 (25.7)<br>(n=59) |
|                                                        | FCM      | 57.3 (28.9)<br>(n=60) | 54.8 (28.4)<br>(n=58) | 44.6 (23.0)<br>(n=58) | 45.2 (21.9)<br>(n=57) | 37.3 (17.9)<br>(n=56) | 38.4 (17.9)<br>(n=54) | 45.0 (19.1)<br>(n=58) |
|                                                        | <i>P</i> | –                     | <i>P</i> = .92        | <i>P</i> = .02        | <i>P</i> = .03        | <i>P</i> < .001       | <i>P</i> < .001       | <i>P</i> = .001       |
| Carboxy-terminal collagen<br>crosslinks (ng/ml)        | IIM      | 0.33 (0.16)<br>(n=61) | 0.37 (0.19)<br>(n=59) | 0.31 (0.15)<br>(n=59) | 0.35 (0.18)<br>(n=55) | 0.34 (0.20)<br>(n=57) | 0.37 (0.21)<br>(n=55) | 0.37 (0.21)<br>(n=57) |
|                                                        | FCM      | 0.29 (0.15)<br>(n=58) | 0.28 (0.15)<br>(n=55) | 0.25 (0.13)<br>(n=57) | 0.25 (0.12)<br>(n=55) | 0.24 (0.11)<br>(n=56) | 0.27 (0.13)<br>(n=55) | 0.30 (0.17)<br>(n=58) |
|                                                        | <i>P</i> | –                     | <i>P</i> = .01        | <i>P</i> = .02        | <i>P</i> < .001       | <i>P</i> < .001       | <i>P</i> < .001       | <i>P</i> = .10        |

| End point                                     |          | Day                          |                         |                         |                         |                         |                        |                        |
|-----------------------------------------------|----------|------------------------------|-------------------------|-------------------------|-------------------------|-------------------------|------------------------|------------------------|
|                                               |          | 0                            | 1                       | 7                       | 8                       | 14                      | 21                     | 35                     |
|                                               |          | Mean (SD)<br>n               | Mean (SD)<br>n          | Mean (SD)<br>n          | Mean (SD)<br>n          | Mean (SD)<br>n          | Mean (SD)<br>n         | Mean (SD)<br>n         |
| <b>Trial B</b>                                |          |                              |                         |                         |                         |                         |                        |                        |
| Serum phosphate (mg/dl)                       | IIM      | 3.4 (0.5)<br>(n=62)          | 3.6 (0.5)<br>(n=61)     | 3.0 (0.6)<br>(n=60)     | 3.0 (0.6)<br>(n=59)     | 3.1 (0.6)<br>(n=58)     | 3.3 (0.5)<br>(n=56)    | 3.5 (0.5)<br>(n=58)    |
|                                               | FCM      | 3.3 (0.5)<br>(n=57)          | 3.1 (0.4)<br>(n=53)     | 2.5 (0.7)<br>(n=55)     | 2.2 (0.7)<br>(n=53)     | 1.8 (0.7)<br>(n=53)     | 2.1 (0.9)<br>(n=55)    | 2.3 (0.9)<br>(n=56)    |
|                                               | <i>P</i> | –                            | <i>P</i> < .001         | <i>P</i> < .001         | <i>P</i> < .001         | <i>P</i> < .001         | <i>P</i> < .001        | <i>P</i> < .001        |
| Urinary fractional excretion of phosphate (%) | IIM      | 9.4 (4.9)<br>(n=38)          | 10.2 (6.1)<br>(n=38)    | 10.8 (5.8)<br>(n=44)    | 12.4 (6.1)<br>(n=43)    | 10.3 (4.9)<br>(n=45)    | 10.0 (4.0)<br>(n=46)   | 10.9 (5.7)<br>(n=52)   |
|                                               | FCM      | 10.2 (4.5)<br>(n=37)         | 11.4 (4.3)<br>(n=36)    | 14.9 (6.5)<br>(n=39)    | 15.7 (6.0)<br>(n=37)    | 18.4 (10.0)<br>(n=41)   | 16.9 (7.9)<br>(n=44)   | 15.5 (8.4)<br>(n=50)   |
|                                               | <i>P</i> | –                            | <i>P</i> = .21          | <i>P</i> = .004         | <i>P</i> = .001         | <i>P</i> < .001         | <i>P</i> < .001        | <i>P</i> = .007        |
| Intact FGF23 (pg/ml)                          | IIM      | 60.9 (50.3)<br>(n=60)        | 55.6 (50.1)<br>(n=61)   | 77.7 (62.9)<br>(n=60)   | 69.4 (50.0)<br>(n=59)   | 55.7 (45.9)<br>(n=57)   | 52.8 (44.3)<br>(n=56)  | 51.7 (46.6)<br>(n=58)  |
|                                               | FCM      | 53.6 (35.3)<br>(n=57)        | 147.8 (104.2)<br>(n=54) | 87.1 (73.1)<br>(n=56)   | 311.6 (222.5)<br>(n=54) | 127.5 (104.5)<br>(n=56) | 107.9 (84.9)<br>(n=56) | 64.7 (49.4)<br>(n=55)  |
|                                               | <i>P</i> | –                            | <i>P</i> < .001         | <i>P</i> = .11          | <i>P</i> < .001         | <i>P</i> < .001         | <i>P</i> < .001        | <i>P</i> = .004        |
| C-terminal FGF23 (RU/ml)                      | IIM      | 835.4 (802.2)<br>(n=55)      | 136.5 (77.6)<br>(n=61)  | 130.5 (126.7)<br>(n=61) | 108.4 (49.2)<br>(n=57)  | 96.7 (45.2)<br>(n=53)   | 96.7 (47.8)<br>(n=55)  | 104.9 (63.4)<br>(n=53) |
|                                               | FCM      | 1060.9<br>(1799.4)<br>(n=49) | 239.0 (120.1)<br>(n=52) | 141.3 (85.4)<br>(n=55)  | 319.3 (152.5)<br>(n=48) | 158.1 (88.8)<br>(n=55)  | 143.9 (64.5)<br>(n=53) | 115.4 (85.7)<br>(n=55) |
|                                               | <i>P</i> | –                            | <i>P</i> = .12          | <i>P</i> = .55          | <i>P</i> < .001         | <i>P</i> = .35          | <i>P</i> = .20         | <i>P</i> = .44         |
| 1,25-Dihydroxyvitamin D (pg/ml)               | IIM      | 55.6 (16.4)<br>(n=61)        | 61.0 (16.8)<br>(n=60)   | 38.6 (17.9)<br>(n=61)   | 41.6 (16.1)<br>(n=59)   | 54.6 (17.6)<br>(n=58)   | 55.3 (14.9)<br>(n=57)  | 55.7 (15.1)<br>(n=58)  |
|                                               | FCM      | 59.6 (19.6)<br>(n=57)        | 42.6 (18.2)<br>(n=56)   | 36.0 (30.6)<br>(n=56)   | 25.0 (22.9)<br>(n=55)   | 23.8 (21.7)<br>(n=56)   | 35.9 (25.5)<br>(n=55)  | 46.7 (22.9)<br>(n=55)  |
|                                               | <i>P</i> | –                            | <i>P</i> < .001         | <i>P</i> = .29          | <i>P</i> < .001         | <i>P</i> < .001         | <i>P</i> < .001        | <i>P</i> = .03         |
| 24,25-Dihydroxyvitamin D (ng/ml)              | IIM      | 2.0 (1.6)<br>(n=53)          | 2.0 (1.5)<br>(n=54)     | 2.3 (1.7)<br>(n=53)     | 2.1 (1.6)<br>(n=50)     | 2.1 (1.6)<br>(n=50)     | 2.0 (1.6)<br>(n=52)    | 2.1 (1.6)<br>(n=50)    |
|                                               | FCM      | 1.9 (1.1)<br>(n=47)          | 2.0 (1.0)<br>(n=46)     | 2.2 (1.1)<br>(n=47)     | 2.3 (1.1)<br>(n=45)     | 2.5 (1.2)<br>(n=46)     | 2.4 (1.2)<br>(n=46)    | 2.2 (0.9)<br>(n=45)    |
|                                               | <i>P</i> | –                            | <i>P</i> = .51          | <i>P</i> = .76          | <i>P</i> = .32          | <i>P</i> = .002         | <i>P</i> < .001        | <i>P</i> = .11         |

| End point                                              |          | Day                   |                       |                       |                       |                       |                       |                       |
|--------------------------------------------------------|----------|-----------------------|-----------------------|-----------------------|-----------------------|-----------------------|-----------------------|-----------------------|
|                                                        |          | 0                     | 1                     | 7                     | 8                     | 14                    | 21                    | 35                    |
|                                                        |          | Mean (SD)<br>n        |
| <b>Trial B (continued)</b>                             |          |                       |                       |                       |                       |                       |                       |                       |
| 25-Hydroxyvitamin D (ng/ml)                            | IIM      | 23.2 (11.0)<br>(n=56) | 22.6 (10.2)<br>(n=54) | 22.6 (10.3)<br>(n=55) | 22.3 (10.4)<br>(n=51) | 22.1 (10.1)<br>(n=51) | 22.2 (10.1)<br>(n=51) | 23.7 (9.7)<br>(n=50)  |
|                                                        | FCM      | 23.8 (10.0)<br>(n=48) | 23.9 (10.0)<br>(n=47) | 24.8 (10.3)<br>(n=47) | 25.3 (10.2)<br>(n=45) | 24.8 (10.4)<br>(n=46) | 24.4 (9.6)<br>(n=45)  | 23.8 (8.1)<br>(n=44)  |
|                                                        | <i>P</i> | –                     | <i>P</i> = .69        | <i>P</i> = .10        | <i>P</i> = .02        | <i>P</i> = .02        | <i>P</i> = .10        | <i>P</i> = .89        |
| Ionized calcium (mg/dl)                                | IIM      | 5.11 (0.21)<br>(n=54) | 5.11 (0.20)<br>(n=57) | 5.13 (0.21)<br>(n=55) | 5.12 (0.21)<br>(n=56) | 5.05 (0.51)<br>(n=52) | 5.14 (0.19)<br>(n=56) | 5.13 (0.24)<br>(n=56) |
|                                                        | FCM      | 5.07 (0.22)<br>(n=51) | 5.13 (0.22)<br>(n=47) | 5.07 (0.21)<br>(n=51) | 5.07 (0.22)<br>(n=49) | 5.01 (0.23)<br>(n=48) | 5.07 (0.23)<br>(n=53) | 5.05 (0.23)<br>(n=50) |
|                                                        | <i>P</i> | –                     | <i>P</i> = .30        | <i>P</i> = .16        | <i>P</i> = .13        | <i>P</i> = .94        | <i>P</i> = .04        | <i>P</i> = .24        |
| Intact parathyroid hormone (pg/ml)                     | IIM      | 55.4 (26.5)<br>(n=62) | 55.7 (25.3)<br>(n=60) | 54.6 (24.4)<br>(n=59) | 53.9 (27.5)<br>(n=57) | 62.3 (32.2)<br>(n=56) | 56.4 (30.8)<br>(n=56) | 54.0 (29.0)<br>(n=57) |
|                                                        | FCM      | 59.9 (33.9)<br>(n=57) | 53.3 (28.5)<br>(n=54) | 62.1 (34.7)<br>(n=55) | 58.2 (31.3)<br>(n=54) | 83.4 (40.5)<br>(n=54) | 83.4 (45.2)<br>(n=56) | 83.5 (45.5)<br>(n=55) |
|                                                        | <i>P</i> | –                     | <i>P</i> = .22        | <i>P</i> = .30        | <i>P</i> = .92        | <i>P</i> = .003       | <i>P</i> < .001       | <i>P</i> < .001       |
| Alkaline phosphatase (IU/l)<br>(exploratory end point) | IIM      | 71.8 (18.5)<br>(n=60) | 72.0 (17.8)<br>(n=61) | 72.1 (16.5)<br>(n=60) | 72.3 (16.6)<br>(n=59) | 69.6 (16.8)<br>(n=58) | 68.4 (17.4)<br>(n=56) | 70.8 (18.0)<br>(n=58) |
|                                                        | FCM      | 76.9 (26.8)<br>(n=55) | 79.0 (27.7)<br>(n=51) | 78.8 (28.7)<br>(n=55) | 79.9 (29.3)<br>(n=53) | 81.7 (37.9)<br>(n=53) | 83.4 (50.5)<br>(n=55) | 83.8 (39.7)<br>(n=56) |
|                                                        | <i>P</i> | –                     | <i>P</i> = .32        | <i>P</i> = .22        | <i>P</i> = .08        | <i>P</i> = .05        | <i>P</i> = .16        | <i>P</i> = .04        |
| N-terminal propeptide of Type I<br>collagen (ng/ml)    | IIM      | 58.4 (25.4)<br>(n=60) | 56.6 (23.3)<br>(n=61) | 49.8 (19.9)<br>(n=60) | 50.0 (20.8)<br>(n=59) | 50.1 (21.4)<br>(n=57) | 53.6 (22.0)<br>(n=57) | 55.6 (21.1)<br>(n=58) |
|                                                        | FCM      | 65.6 (39.4)<br>(n=57) | 59.7 (30.3)<br>(n=56) | 53.8 (30.2)<br>(n=56) | 52.2 (29.0)<br>(n=55) | 48.3 (27.2)<br>(n=53) | 49.2 (33.2)<br>(n=56) | 53.2 (35.4)<br>(n=56) |
|                                                        | <i>P</i> | –                     | <i>P</i> = .35        | <i>P</i> = .83        | <i>P</i> = .18        | <i>P</i> < .001       | <i>P</i> < .001       | <i>P</i> = .01        |
| Carboxy-terminal collagen<br>crosslinks (ng/ml)        | IIM      | 0.33 (0.15)<br>(n=61) | 0.37 (0.20)<br>(n=61) | 0.32 (0.18)<br>(n=61) | 0.33 (0.19)<br>(n=59) | 0.32 (0.16)<br>(n=57) | 0.35 (0.16)<br>(n=56) | 0.34 (0.17)<br>(n=57) |
|                                                        | FCM      | 0.38 (0.22)<br>(n=57) | 0.34 (0.17)<br>(n=56) | 0.34 (0.21)<br>(n=56) | 0.28 (0.15)<br>(n=54) | 0.31 (0.17)<br>(n=56) | 0.34 (0.19)<br>(n=56) | 0.39 (0.21)<br>(n=56) |
|                                                        | <i>P</i> | –                     | <i>P</i> = .01        | <i>P</i> = .34        | <i>P</i> < .001       | <i>P</i> = .06        | <i>P</i> = .15        | <i>P</i> = .74        |

| End point                                     |          | Day                          |                          |                         |                          |                          |                         |                         |
|-----------------------------------------------|----------|------------------------------|--------------------------|-------------------------|--------------------------|--------------------------|-------------------------|-------------------------|
|                                               |          | 0                            | 1                        | 7                       | 8                        | 14                       | 21                      | 35                      |
|                                               |          | Mean (SD)<br>n               | Mean (SD)<br>n           | Mean (SD)<br>n          | Mean (SD)<br>n           | Mean (SD)<br>n           | Mean (SD)<br>n          | Mean (SD)<br>n          |
| <b>Pooled data for Trial A and Trial B</b>    |          |                              |                          |                         |                          |                          |                         |                         |
| Serum phosphate (mg/dl)                       | IIM      | 3.4 (0.5)<br>(n=125)         | 3.6 (0.5)<br>(n=120)     | 3.1 (0.6)<br>(n=120)    | 3.1 (0.6)<br>(n=116)     | 3.2 (0.6)<br>(n=116)     | 3.3 (0.6)<br>(n=110)    | 3.5 (0.6)<br>(n=117)    |
|                                               | FCM      | 3.3 (0.5)<br>(n=117)         | 3.1 (0.5)<br>(n=109)     | 2.3 (0.6)<br>(n=113)    | 2.2 (0.6)<br>(n=110)     | 1.9 (0.7)<br>(n=109)     | 2.2 (1.0)<br>(n=111)    | 2.4 (0.9)<br>(n=114)    |
|                                               | <i>P</i> | –                            | <i>P</i> < .001          | <i>P</i> < .001         | <i>P</i> < .001          | <i>P</i> < .001          | <i>P</i> < .001         | <i>P</i> < .001         |
| Urinary fractional excretion of phosphate (%) | IIM      | 10.3 (5.9)<br>(n=78)         | 10.2 (6.2)<br>(n=79)     | 11.3 (5.7)<br>(n=87)    | 12.3 (6.4)<br>(n=83)     | 10.7 (5.4)<br>(n=89)     | 10.7 (5.4)<br>(n=88)    | 10.6 (5.2)<br>(n=101)   |
|                                               | FCM      | 10.3 (4.6)<br>(n=79)         | 12.2 (4.7)<br>(n=76)     | 16.9 (7.7)<br>(n=81)    | 17.7 (8.1)<br>(n=79)     | 20.2 (10.8)<br>(n=87)    | 17.8 (9.2)<br>(n=91)    | 15.4 (8.8)<br>(n=98)    |
|                                               | <i>P</i> | –                            | <i>P</i> < .001          | <i>P</i> < .001         | <i>P</i> < .001          | <i>P</i> < .001          | <i>P</i> < .001         | <i>P</i> < .001         |
| Intact FGF23 (pg/ml)                          | IIM      | 59.9 (45.2)<br>(n=119)       | 58.3 (54.0)<br>(n=119)   | 73.3 (54.4)<br>(n=120)  | 66.9 (42.4)<br>(n=113)   | 53.5 (43.1)<br>(n=114)   | 54.4 (46.5)<br>(n=110)  | 49.9 (37.7)<br>(n=116)  |
|                                               | FCM      | 49.9 (29.0)<br>(n=114)       | 149.5 (96.9)<br>(n=109)  | 102.6 (77.7)<br>(n=112) | 327.9 (240.5)<br>(n=110) | 139.2 (108.2)<br>(n=112) | 109.9 (89.3)<br>(n=111) | 72.0 (56.5)<br>(n=112)  |
|                                               | <i>P</i> | –                            | <i>P</i> < .001          | <i>P</i> < .001         | <i>P</i> < .001          | <i>P</i> < .001          | <i>P</i> < .001         | <i>P</i> < .001         |
| C-terminal FGF23 (RU/ml)                      | IIM      | 841.5 (803.6)<br>(n=115)     | 137.0 (74.8)<br>(n=118)  | 125.1 (95.9)<br>(n=116) | 118.8 (74.6)<br>(n=112)  | 102.2 (42.2)<br>(n=110)  | 100.7 (47.5)<br>(n=106) | 107.0 (54.7)<br>(n=106) |
|                                               | FCM      | 833.7<br>(1338.9)<br>(n=104) | 228.4 (121.0)<br>(n=105) | 151.5 (79.7)<br>(n=110) | 311.3 (162.8)<br>(n=103) | 175.8 (111.6)<br>(n=110) | 141.3 (64.4)<br>(n=106) | 118.8 (72.8)<br>(n=112) |
|                                               | <i>P</i> | –                            | <i>P</i> < .001          | <i>P</i> = .14          | <i>P</i> < .001          | <i>P</i> < .001          | <i>P</i> < .001         | <i>P</i> = .40          |
| 1,25-Dihydroxyvitamin D (pg/ml)               | IIM      | 57.3 (17.3)<br>(n=123)       | 62.1 (20.6)<br>(n=119)   | 38.9 (18.1)<br>(n=121)  | 42.0 (17.6)<br>(n=117)   | 54.9 (15.9)<br>(n=116)   | 55.6 (15.1)<br>(n=113)  | 55.5 (15.6)<br>(n=117)  |
|                                               | FCM      | 61.8 (19.5)<br>(n=117)       | 43.0 (17.6)<br>(n=114)   | 30.5 (26.6)<br>(n=114)  | 24.7 (24.1)<br>(n=113)   | 24.3 (21.9)<br>(n=113)   | 35.4 (26.9)<br>(n=111)  | 46.4 (23.1)<br>(n=113)  |
|                                               | <i>P</i> | –                            | <i>P</i> < .001          | <i>P</i> < .001         | <i>P</i> < .001          | <i>P</i> < .001          | <i>P</i> < .001         | <i>P</i> < .001         |
| 24,25-Dihydroxyvitamin D (ng/ml)              | IIM      | 2.0 (1.4)<br>(n=114)         | 2.0 (1.3)<br>(n=113)     | 2.3 (1.5)<br>(n=113)    | 2.2 (1.4)<br>(n=108)     | 2.2 (1.4)<br>(n=108)     | 2.1 (1.4)<br>(n=108)    | 2.1 (1.4)<br>(n=109)    |
|                                               | FCM      | 2.2 (1.2)<br>(n=103)         | 2.3 (1.2)<br>(n=104)     | 2.7 (1.5)<br>(n=105)    | 2.8 (1.5)<br>(n=103)     | 3.0 (1.5)<br>(n=102)     | 2.9 (1.4)<br>(n=101)    | 2.7 (1.4)<br>(n=103)    |
|                                               | <i>P</i> | –                            | <i>P</i> = .07           | <i>P</i> = .04          | <i>P</i> < .001          | <i>P</i> < .001          | <i>P</i> < .001         | <i>P</i> < .001         |

| End point                                              |          | Day                    |                        |                        |                        |                        |                        |                        |
|--------------------------------------------------------|----------|------------------------|------------------------|------------------------|------------------------|------------------------|------------------------|------------------------|
|                                                        |          | 0                      | 1                      | 7                      | 8                      | 14                     | 21                     | 35                     |
|                                                        |          | Mean (SD)<br>n         |
| <b>Pooled data for Trial A and Trial B (continued)</b> |          |                        |                        |                        |                        |                        |                        |                        |
| 25-Hydroxyvitamin D (ng/ml)                            | IIM      | 23.2 (9.4)<br>(n=118)  | 23.2 (8.8)<br>(n=113)  | 23.6 (9.1)<br>(n=115)  | 23.2 (9.1)<br>(n=109)  | 23.2 (9.0)<br>(n=109)  | 23.3 (9.2)<br>(n=106)  | 23.6 (8.8)<br>(n=109)  |
|                                                        | FCM      | 25.0 (8.9)<br>(n=108)  | 25.2 (9.0)<br>(n=105)  | 25.1 (9.1)<br>(n=104)  | 25.8 (9.1)<br>(n=103)  | 24.9 (9.3)<br>(n=103)  | 25.0 (8.5)<br>(n=102)  | 25.0 (7.3)<br>(n=100)  |
|                                                        | <i>P</i> | –                      | <i>P</i> = .46         | <i>P</i> = .35         | <i>P</i> = .30         | <i>P</i> = .71         | <i>P</i> > .99         | <i>P</i> = .94         |
| Ionized calcium (mg/dl)                                | IIM      | 5.09 (0.21)<br>(n=113) | 5.11 (0.21)<br>(n=113) | 5.11 (0.20)<br>(n=110) | 5.12 (0.21)<br>(n=110) | 5.07 (0.39)<br>(n=108) | 5.13 (0.20)<br>(n=110) | 5.12 (0.24)<br>(n=107) |
|                                                        | FCM      | 5.08 (0.22)<br>(n=111) | 5.10 (0.22)<br>(n=103) | 5.04 (0.19)<br>(n=107) | 5.06 (0.21)<br>(n=105) | 5.00 (0.21)<br>(n=101) | 5.05 (0.23)<br>(n=103) | 5.05 (0.24)<br>(n=105) |
|                                                        | <i>P</i> | –                      | <i>P</i> = .87         | <i>P</i> = .003        | <i>P</i> = .01         | <i>P</i> = .21         | <i>P</i> < .001        | <i>P</i> = .06         |
| Intact parathyroid hormone (pg/ml)                     | IIM      | 55.3 (26.3)<br>(n=124) | 54.3 (25.4)<br>(n=117) | 52.7 (26.0)<br>(n=117) | 54.8 (29.9)<br>(n=112) | 60.9 (32.9)<br>(n=111) | 55.5 (30.0)<br>(n=109) | 54.7 (28.5)<br>(n=111) |
|                                                        | FCM      | 55.7 (30.5)<br>(n=116) | 53.7 (26.0)<br>(n=108) | 60.3 (32.1)<br>(n=112) | 56.4 (29.9)<br>(n=110) | 75.6 (39.5)<br>(n=111) | 75.7 (40.9)<br>(n=112) | 78.0 (45.5)<br>(n=112) |
|                                                        | <i>P</i> | –                      | <i>P</i> = .44         | <i>P</i> = .02         | <i>P</i> = .93         | <i>P</i> < .001        | <i>P</i> < .001        | <i>P</i> < .001        |
| Alkaline phosphatase (IU/l)<br>(exploratory end point) | IIM      | 70.9 (23.1)<br>(n=122) | 71.1 (22.0)<br>(n=120) | 72.1 (19.6)<br>(n=120) | 72.5 (19.2)<br>(n=116) | 70.5 (19.5)<br>(n=115) | 69.9 (19.3)<br>(n=112) | 72.1 (22.0)<br>(n=117) |
|                                                        | FCM      | 74.6 (27.1)<br>(n=113) | 75.5 (29.3)<br>(n=105) | 76.6 (28.4)<br>(n=113) | 79.3 (30.0)<br>(n=111) | 80.1 (34.9)<br>(n=109) | 82.7 (41.2)<br>(n=111) | 82.8 (35.4)<br>(n=114) |
|                                                        | <i>P</i> | –                      | <i>P</i> = .64         | <i>P</i> = .29         | <i>P</i> = .02         | <i>P</i> = .01         | <i>P</i> = .003        | <i>P</i> = .002        |
| N-terminal propeptide of Type I<br>collagen (ng/ml)    | IIM      | 57.4 (25.7)<br>(n=122) | 55.8 (25.3)<br>(n=120) | 49.1 (20.7)<br>(n=120) | 49.3 (20.9)<br>(n=117) | 50.6 (23.5)<br>(n=115) | 53.5 (22.5)<br>(n=113) | 54.7 (23.4)<br>(n=117) |
|                                                        | FCM      | 61.4 (34.5)<br>(n=117) | 57.2 (29.3)<br>(n=114) | 49.1 (27.0)<br>(n=114) | 48.7 (25.8)<br>(n=112) | 42.6 (23.4)<br>(n=109) | 43.9 (27.2)<br>(n=110) | 49.0 (28.5)<br>(n=114) |
|                                                        | <i>P</i> | –                      | <i>P</i> = .36         | <i>P</i> = .07         | <i>P</i> = .01         | <i>P</i> < .001        | <i>P</i> < .001        | <i>P</i> < .001        |
| Carboxy-terminal collagen<br>crosslinks (ng/ml)        | IIM      | 0.33 (0.16)<br>(n=122) | 0.37 (0.19)<br>(n=120) | 0.32 (0.16)<br>(n=120) | 0.34 (0.18)<br>(n=114) | 0.33 (0.18)<br>(n=114) | 0.36 (0.19)<br>(n=111) | 0.36 (0.19)<br>(n=114) |
|                                                        | FCM      | 0.34 (0.20)<br>(n=115) | 0.31 (0.16)<br>(n=111) | 0.29 (0.18)<br>(n=113) | 0.26 (0.14)<br>(n=109) | 0.28 (0.14)<br>(n=112) | 0.31 (0.17)<br>(n=111) | 0.35 (0.20)<br>(n=114) |
|                                                        | <i>P</i> | –                      | <i>P</i> < .001        | <i>P</i> = .04         | <i>P</i> < .001        | <i>P</i> < .001        | <i>P</i> < .001        | <i>P</i> = .23         |

Data are presented for the safety analysis set. *P* values are for between-group comparisons from a mixed model for repeated measures analysis with treatment, day, treatment-by-day, trial (in the pooled analysis) and stratum as fixed effects and baseline value and baseline value-by-day as covariates.

CI, confidence interval; FCM, ferric carboxymaltose; FGF, fibroblast growth factor; IIM, iron isomaltoside 1000/ferric derisomaltose; SD, standard deviation.

**eTable 6.** Least Squares Mean Changes From Baseline in Biochemical and Bone Markers – Trial A, Trial B, and Pooled Data for Trials A and B

**Trial A**

| Biochemical/bone marker                              | IIM    | FCM    | Difference between IIM and FCM (95% CI) | P Value |
|------------------------------------------------------|--------|--------|-----------------------------------------|---------|
| <b>Serum phosphate (mg/dl)</b>                       |        |        |                                         |         |
| Day 1                                                | 0.24   | -0.23  | 0.48 (0.31,0.65)                        | < .001  |
| Day 7                                                | -0.07  | -1.13  | 1.06 (0.85,1.27)                        | < .001  |
| Day 8                                                | -0.09  | -1.12  | 1.03 (0.81,1.25)                        | < .001  |
| Day 14                                               | -0.08  | -1.42  | 1.35 (1.10,1.60)                        | < .001  |
| Day 21                                               | 0.02   | -1.02  | 1.03 (0.75,1.32)                        | < .001  |
| Day 35                                               | 0.22   | -0.91  | 1.13 (0.86,1.39)                        | < .001  |
| <b>Fractional urinary excretion of phosphate (%)</b> |        |        |                                         |         |
| Day 1                                                | -1.6   | 2.3    | -3.9 (-5.9,-1.9)                        | < .001  |
| Day 7                                                | 0.9    | 7.9    | -7.1 (-10.3,-3.8)                       | < .001  |
| Day 8                                                | 1.5    | 8.9    | -7.3 (-11.2,-3.5)                       | < .001  |
| Day 14                                               | 0.7    | 11.2   | -10.4 (-14.9,-6.0)                      | < .001  |
| Day 21                                               | 0.7    | 8.7    | -8.1 (-12.2,-3.9)                       | < .001  |
| Day 35                                               | -1.3   | 4.5    | -5.8 (-9.2,-2.4)                        | .001    |
| <b>Intact FGF23 (pg/ml)</b>                          |        |        |                                         |         |
| Day 1                                                | -2.1   | 103.6  | -105.7 (-131.0,-80.5)                   | < .001  |
| Day 7                                                | 8.6    | 69.4   | -60.8 (-83.0,-38.6)                     | < .001  |
| Day 8                                                | 13.4   | 306.6  | -293.2 (-368.2,-218.3)                  | < .001  |
| Day 14                                               | -5.9   | 111.5  | -117.5 (-151.6,-83.3)                   | < .001  |
| Day 21                                               | -0.2   | 71.0   | -71.2 (-101.8,-40.6)                    | < .001  |
| Day 35                                               | -6.7   | 30.4   | -37.2 (-54.9,-19.4)                     | < .001  |
| <b>C-terminal FGF23 (RU/ml)</b>                      |        |        |                                         |         |
| Day 1                                                | -586.1 | -487.0 | -99.1 (-136.42,-61.76)                  | < .001  |
| Day 7                                                | -597.5 | -548.2 | -49.3 (-72.80,-25.90)                   | < .001  |
| Day 8                                                | -588.0 | -396.7 | -191.3 (-242.47,-140.09)                | < .001  |
| Day 14                                               | -610.0 | -509.3 | -100.7 (-137.19,-64.20)                 | < .001  |
| Day 21                                               | -613.2 | -564.8 | -48.4 (-71.78,-24.96)                   | < .001  |
| Day 35                                               | -604.6 | -589.7 | -15.0 (-35.04, 5.06)                    | .14     |
| <b>Ionized calcium (mg/dl)</b>                       |        |        |                                         |         |
| Day 1                                                | 0.04   | 0.01   | 0.04 (-0.03,0.10)                       | .27     |
| Day 7                                                | 0.02   | -0.06  | 0.09 (0.03,0.14)                        | .004    |
| Day 8                                                | 0.04   | -0.03  | 0.06 (0.00,0.13)                        | .05     |
| Day 14                                               | 0.02   | -0.09  | 0.10 (0.03,0.17)                        | .01     |
| Day 21                                               | 0.06   | -0.04  | 0.10 (0.03,0.17)                        | .01     |
| Day 35                                               | 0.02   | -0.03  | 0.06 (-0.02,0.13)                       | .13     |
| <b>Parathyroid hormone (pg/ml)</b>                   |        |        |                                         |         |
| Day 1                                                | -1.0   | 0.2    | -1.1 (-8.0,5.7)                         | .74     |
| Day 7                                                | -3.4   | 6.4    | -9.7 (-18.8,-0.6)                       | .04     |
| Day 8                                                | 1.9    | 2.4    | -0.5 (-10.6, 9.6)                       | .92     |
| Day 14                                               | 5.1    | 16.3   | -11.2 (-22.8, 0.5)                      | .06     |
| Day 21                                               | -1.9   | 16.3   | -18.2 (-28.7,-7.7)                      | < .001  |
| Day 35                                               | 1.8    | 21.6   | -19.8 (-32.8,-6.8)                      | .003    |

| Biochemical/bone marker                                 | IIM   | FCM   | Difference between IIM and FCM (95% CI) | P Value |
|---------------------------------------------------------|-------|-------|-----------------------------------------|---------|
| <b>25-Hydroxyvitamin D (ng/ml)</b>                      |       |       |                                         |         |
| Day 1                                                   | 0.1   | 0.3   | -0.2 (-1.1,0.6)                         | .56     |
| Day 7                                                   | 0.8   | -1.0  | 1.8 (0.4,3.1)                           | .01     |
| Day 8                                                   | 0.4   | -0.0  | 0.4 (-1.2,2.0)                          | .61     |
| Day 14                                                  | 0.9   | -1.2  | 2.1 (0.1,4.1)                           | .04     |
| Day 21                                                  | 0.5   | -0.7  | 1.2 (-0.8,3.1)                          | .24     |
| Day 35                                                  | -0.5  | -0.3  | -0.2 (-2.2,1.8)                         | .83     |
| <b>1,25-Dihydroxyvitamin D (pg/ml)</b>                  |       |       |                                         |         |
| Day 1                                                   | 4.3   | -20.0 | 24.3 (18.8,29.7)                        | < .001  |
| Day 7                                                   | -21.4 | -37.2 | 15.8 (8.8,22.7)                         | < .001  |
| Day 8                                                   | -17.7 | -37.8 | 20.1 (12.1,28.2)                        | < .001  |
| Day 14                                                  | -5.4  | -37.6 | 32.2 (25.5,39.0)                        | < .001  |
| Day 21                                                  | -4.9  | -27.8 | 22.9 (14.8,31.0)                        | < .001  |
| Day 35                                                  | -5.7  | -16.3 | 10.6 (3.4,17.8)                         | .004    |
| <b>24,25-Dihydroxyvitamin D (ng/ml)</b>                 |       |       |                                         |         |
| Day 1                                                   | -0.03 | 0.14  | -0.17 (-0.34,0.00)                      | .06     |
| Day 7                                                   | 0.33  | 0.69  | -0.37 (-0.60,-0.13)                     | .002    |
| Day 8                                                   | 0.18  | 0.69  | -0.51 (-0.80,-0.21)                     | < .001  |
| Day 14                                                  | 0.14  | 0.94  | -0.80 (-1.11,-0.49)                     | < .001  |
| Day 21                                                  | 0.10  | 0.75  | -0.64 (-1.01,-0.28)                     | < .001  |
| Day 35                                                  | 0.03  | 0.62  | -0.59 (-0.94,-0.23)                     | .001    |
| <b>Alkaline phosphatase (IU/l)</b>                      |       |       |                                         |         |
| Day 1                                                   | 0.3   | 0.4   | -0.1 (-3.9,3.7)                         | .96     |
| Day 7                                                   | 1.6   | 2.5   | -0.9 (-5.5,3.7)                         | .69     |
| Day 8                                                   | 2.9   | 6.6   | -3.6 (-8.4,1.2)                         | .14     |
| Day 14                                                  | 1.4   | 5.6   | -4.2 (-9.8,1.3)                         | .13     |
| Day 21                                                  | 0.3   | 8.7   | -8.4 (-14.2,-2.6)                       | .005    |
| Day 35                                                  | 2.3   | 9.6   | -7.3 (-13.7,-0.9)                       | .03     |
| <b>Bone-specific alkaline phosphatase (µg/l)</b>        |       |       |                                         |         |
| Day 1                                                   | 0.4   | 0.3   | 0.1 (-0.4,0.7)                          | .67     |
| Day 7                                                   | -0.1  | 0.6   | -0.7 (-1.3,-0.1)                        | .03     |
| Day 8                                                   | 0.0   | 1.3   | -1.3 (-2.1,-0.5)                        | .002    |
| Day 14                                                  | -0.1  | 0.8   | -1.0 (-2.0,0.1)                         | .07     |
| Day 21                                                  | -0.1  | 1.5   | -1.6 (-2.7,-0.6)                        | .003    |
| Day 35                                                  | 0.5   | 2.3   | -1.8 (-2.8,-0.7)                        | < .001  |
| <b>N-terminal propeptide of Type I collagen (ng/ml)</b> |       |       |                                         |         |
| Day 1                                                   | -1.8  | -2.0  | 0.2 (-3.6,3.9)                          | .92     |
| Day 7                                                   | -7.0  | -11.8 | 4.8 (0.7,8.9)                           | .02     |
| Day 8                                                   | -6.7  | -11.4 | 4.7 (0.4,8.9)                           | .03     |
| Day 14                                                  | -4.9  | -19.5 | 14.6 (9.2,20.1)                         | < .001  |
| Day 21                                                  | -2.2  | -17.3 | 15.1 (9.6,20.5)                         | < .001  |
| Day 35                                                  | -1.7  | -11.4 | 9.7 (3.9,15.5)                          | .001    |
| <b>Carboxy-terminal collagen crosslinks (ng/ml)</b>     |       |       |                                         |         |
| Day 1                                                   | 0.05  | -0.01 | 0.05 (0.01,0.10)                        | .01     |
| Day 7                                                   | 0.00  | -0.04 | 0.05 (0.01,0.09)                        | .02     |
| Day 8                                                   | 0.03  | -0.05 | 0.08 (0.04,0.12)                        | < .001  |
| Day 14                                                  | 0.02  | -0.06 | 0.08 (0.04,0.13)                        | < .001  |
| Day 21                                                  | 0.06  | -0.04 | 0.10 (0.05,0.15)                        | < .001  |
| Day 35                                                  | 0.05  | 0.00  | 0.05 (-0.01,0.10)                       | 0.10    |

Data presented are for the safety analysis set.

Estimates are derived from a mixed model for repeated measurements with treatment, day, treatment-by-day interaction, and randomized strata as fixed effects, and baseline value and baseline value-by-day interactions as covariates.

CI, confidence interval; FCM, ferric carboxymaltose; FGF23, fibroblast growth factor; IIM, iron isomaltoside 1000/ferric derisomaltose.

**Trial B**

| Biochemical/bone marker                              | IIM    | FCM    | Difference between IIM and FCM (95% CI) | P Value |
|------------------------------------------------------|--------|--------|-----------------------------------------|---------|
| <b>Serum phosphate (mg/dl)</b>                       |        |        |                                         |         |
| Day 1                                                | 0.23   | -0.23  | 0.46 (0.30, 0.62)                       | < .001  |
| Day 7                                                | -0.38  | -0.92  | 0.54 (0.32, 0.76)                       | < .001  |
| Day 8                                                | -0.40  | -1.13  | 0.73 (0.49, 0.96)                       | < .001  |
| Day 14                                               | -0.28  | -1.50  | 1.22 (0.99, 1.46)                       | < .001  |
| Day 21                                               | -0.05  | -1.30  | 1.24 (0.98, 1.51)                       | < .001  |
| Day 35                                               | 0.15   | -1.02  | 1.17 (0.91, 1.43)                       | < .001  |
| <b>Fractional urinary excretion of phosphate (%)</b> |        |        |                                         |         |
| Day 1                                                | 0.3    | 1.7    | -1.4 (-3.5, 0.8)                        | .21     |
| Day 7                                                | 1.2    | 5.0    | -3.9 (-6.4, -1.3)                       | .004    |
| Day 8                                                | 2.2    | 6.4    | -4.2 (-6.7, -1.7)                       | .001    |
| Day 14                                               | -0.2   | 8.4    | -8.6 (-12.0, -5.2)                      | < .001  |
| Day 21                                               | -0.0   | 6.5    | -6.5 (-9.2, -3.8)                       | < .001  |
| Day 35                                               | 1.0    | 5.3    | -4.3 (-7.4, -1.2)                       | .007    |
| <b>Intact FGF23 (pg/ml)</b>                          |        |        |                                         |         |
| Day 1                                                | -4.6   | 92.3   | -96.8 (-119.8, -73.8)                   | < .001  |
| Day 7                                                | 17.1   | 32.8   | -15.7 (-34.9, 3.4)                      | .11     |
| Day 8                                                | 6.2    | 257.9  | -251.7 (-307.2, -196.2)                 | < .001  |
| Day 14                                               | -5.9   | 73.2   | -79.1 (-103.7, -54.5)                   | < .001  |
| Day 21                                               | -8.5   | 53.3   | -61.8 (-83.0, -40.5)                    | < .001  |
| Day 35                                               | -8.7   | 9.3    | -18.0 (-30.1, -5.9)                     | .004    |
| <b>C-terminal FGF23 (RU/ml)</b>                      |        |        |                                         |         |
| Day 1                                                | -796.2 | -738.7 | -57.5 (-131.1, 16.1)                    | .12     |
| Day 7                                                | -807.2 | -827.9 | 20.7 (-49.7, 91.0)                      | .55     |
| Day 8                                                | -816.7 | -661.0 | -155.7 (-234.7, -76.6)                  | < .001  |
| Day 14                                               | -835.8 | -808.5 | -27.3 (-86.0, 31.5)                     | .35     |
| Day 21                                               | -848.2 | -823.9 | -24.3 (-62.3, 13.7)                     | .20     |
| Day 35                                               | -840.9 | -852.2 | 11.3 (-18.6, 41.2)                      | .44     |
| <b>Ionized calcium (mg/dl)</b>                       |        |        |                                         |         |
| Day 1                                                | 0.01   | 0.04   | -0.03 (-0.10, 0.03)                     | .30     |
| Day 7                                                | 0.04   | -0.01  | 0.05 (-0.02, 0.13)                      | .16     |
| Day 8                                                | 0.02   | -0.03  | 0.05 (-0.02, 0.12)                      | .13     |
| Day 14                                               | -0.08  | -0.07  | -0.01 (-0.17, 0.16)                     | .94     |
| Day 21                                               | 0.04   | -0.03  | 0.07 (0.00, 0.14)                       | .04     |
| Day 35                                               | 0.02   | -0.02  | 0.05 (-0.03, 0.12)                      | .24     |
| <b>Parathyroid hormone (pg/ml)</b>                   |        |        |                                         |         |
| Day 1                                                | -0.9   | -5.5   | 4.6 (-2.7, 11.9)                        | .22     |
| Day 7                                                | -2.5   | 2.2    | -4.6 (-13.5, 4.2)                       | .30     |
| Day 8                                                | -1.9   | -2.3   | 0.4 (-7.8, 8.6)                         | .92     |
| Day 14                                               | 6.9    | 22.6   | -15.7 (-26.1, -5.3)                     | .003    |
| Day 21                                               | 0.8    | 23.3   | -22.5 (-33.9, -11.2)                    | < .001  |
| Day 35                                               | -1.8   | 23.0   | -24.8 (-35.4, -14.2)                    | < .001  |



| Biochemical/bone marker                                 | IIM   | FCM   | Difference between IIM and FCM (95% CI) | P Value |
|---------------------------------------------------------|-------|-------|-----------------------------------------|---------|
| <b>25-Hydroxyvitamin D (ng/ml)</b>                      |       |       |                                         |         |
| Day 1                                                   | -0.5  | -0.3  | -0.2 (-1.1, 0.7)                        | .69     |
| Day 7                                                   | -0.4  | 0.6   | -1.0 (-2.3, 0.2)                        | .10     |
| Day 8                                                   | -0.9  | 0.8   | -1.6 (-3.0, -0.3)                       | .02     |
| Day 14                                                  | -1.2  | 0.7   | -1.9 (-3.5, -0.3)                       | .02     |
| Day 21                                                  | -1.3  | 0.1   | -1.4 (-3.0, 0.3)                        | .10     |
| Day 35                                                  | -0.3  | -0.5  | 0.1 (-1.8, 2.0)                         | .89     |
| <b>1,25-Dihydroxyvitamin D (pg/ml)</b>                  |       |       |                                         |         |
| Day 1                                                   | 5.4   | -16.5 | 21.8 (17.7, 26.0)                       | < .001  |
| Day 7                                                   | -17.9 | -22.5 | 4.6 (-4.1, 13.3)                        | .29     |
| Day 8                                                   | -14.0 | -33.5 | 19.6 (12.4, 26.7)                       | < .001  |
| Day 14                                                  | -1.4  | -34.5 | 33.1 (26.0, 40.1)                       | < .001  |
| Day 21                                                  | -0.9  | -22.7 | 21.8 (14.2, 29.4)                       | < .001  |
| Day 35                                                  | -0.6  | -9.7  | 9.0 (1.2, 16.9)                         | .03     |
| <b>24,25-Dihydroxyvitamin D (ng/ml)</b>                 |       |       |                                         |         |
| Day 1                                                   | 0.02  | 0.08  | -0.06 (-0.22, 0.11)                     | .51     |
| Day 7                                                   | 0.30  | 0.26  | 0.04 (-0.24, 0.32)                      | .76     |
| Day 8                                                   | 0.24  | 0.38  | -0.14 (-0.41, 0.14)                     | .32     |
| Day 14                                                  | 0.09  | 0.56  | -0.47 (-0.76, -0.18)                    | .002    |
| Day 21                                                  | 0.00  | 0.51  | -0.50 (-0.77, -0.24)                    | < .001  |
| Day 35                                                  | 0.01  | 0.23  | -0.23 (-0.50, 0.05)                     | .11     |
| <b>Alkaline phosphatase (IU/l)</b>                      |       |       |                                         |         |
| Day 1                                                   | 0.4   | 1.4   | -1.0 (-3.0, 1.0)                        | .32     |
| Day 7                                                   | 0.7   | 2.4   | -1.7 (-4.5, 1.1)                        | .22     |
| Day 8                                                   | 0.8   | 3.6   | -2.8 (-6.1, 0.4)                        | .08     |
| Day 14                                                  | -0.5  | 4.5   | -5.0 (-10.0, -0.0)                      | .05     |
| Day 21                                                  | -0.4  | 5.2   | -5.6 (-13.3, 2.2)                       | .16     |
| Day 35                                                  | 1.1   | 6.9   | -5.8 (-11.2, -0.3)                      | .04     |
| <b>Bone-specific alkaline phosphatase (µg/l)</b>        |       |       |                                         |         |
| Day 1                                                   | -0.0  | 0.3   | -0.4 (-1.2, 0.4)                        | .34     |
| Day 7                                                   | -0.2  | 0.3   | -0.5 (-1.1, 0.1)                        | .10     |
| Day 8                                                   | -0.3  | 0.6   | -0.9 (-1.7, -0.1)                       | .03     |
| Day 14                                                  | -0.3  | 1.1   | -1.3 (-2.4, -0.3)                       | .01     |
| Day 21                                                  | -0.2  | 1.2   | -1.4 (-2.5, -0.3)                       | .01     |
| Day 35                                                  | -0.1  | 2.1   | -2.3 (-3.2, -1.3)                       | < .001  |
| <b>N-terminal propeptide of Type I collagen (ng/ml)</b> |       |       |                                         |         |
| Day 1                                                   | -3.4  | -4.9  | 1.5 (-1.7, 4.7)                         | .35     |
| Day 7                                                   | -10.0 | -10.5 | 0.5 (-3.9, 4.9)                         | .83     |
| Day 8                                                   | -9.5  | -12.4 | 2.9 (-1.4, 7.1)                         | .18     |
| Day 14                                                  | -9.4  | -16.4 | 6.9 (3.2, 10.7)                         | < .001  |
| Day 21                                                  | -5.3  | -15.4 | 10.1 (4.7, 15.5)                        | < .001  |
| Day 35                                                  | -2.8  | -11.2 | 8.3 (1.8, 14.8)                         | .01     |
| <b>Carboxy-terminal collagen crosslinks (ng/ml)</b>     |       |       |                                         |         |
| Day 1                                                   | 0.03  | -0.03 | 0.06 (0.01, 0.11)                       | .01     |
| Day 7                                                   | -0.01 | -0.04 | 0.02 (-0.03, 0.08)                      | .34     |
| Day 8                                                   | 0.00  | -0.09 | 0.09 (0.04, 0.14)                       | < .001  |
| Day 14                                                  | -0.02 | -0.06 | 0.04 (-0.00, 0.09)                      | .06     |
| Day 21                                                  | 0.01  | -0.03 | 0.04 (-0.01, 0.09)                      | .15     |
| Day 35                                                  | 0.01  | 0.02  | -0.01 (-0.06, 0.04)                     | .74     |

Data presented are for the safety analysis set.

Estimates are derived from a mixed model for repeated measurements with treatment, day, treatment-by-day interaction, and randomized strata as fixed effects, and baseline value and baseline value-by-day interactions as covariates.

CI, confidence interval; FCM, ferric carboxymaltose; FGF23, fibroblast growth factor; IIM, iron isomaltoside 1000/ferric derisomaltose.

**Pooled data for Trial A and Trial B**

| Biochemical/bone marker                              | IIM    | FCM    | Difference between IIM and FCM (95% CI) | P Value |
|------------------------------------------------------|--------|--------|-----------------------------------------|---------|
| <b>Serum phosphate (mg/dl)</b>                       |        |        |                                         |         |
| Day 1                                                | 0.24   | -0.23  | 0.47 (0.36, 0.58)                       | < .001  |
| Day 7                                                | -0.22  | -1.03  | 0.81 (0.66, 0.96)                       | < .001  |
| Day 8                                                | -0.25  | -1.13  | 0.88 (0.72, 1.04)                       | < .001  |
| Day 14                                               | -0.18  | -1.46  | 1.29 (1.12, 1.46)                       | < .001  |
| Day 21                                               | -0.02  | -1.15  | 1.13 (0.94, 1.33)                       | < .001  |
| Day 35                                               | 0.18   | -0.96  | 1.14 (0.96, 1.32)                       | < .001  |
| <b>Fractional urinary excretion of phosphate (%)</b> |        |        |                                         |         |
| Day 1                                                | -0.7   | 2.1    | -2.8 (-4.2, -1.3)                       | < .001  |
| Day 7                                                | 0.9    | 6.7    | -5.7 (-7.9, -3.6)                       | < .001  |
| Day 8                                                | 1.7    | 7.8    | -6.1 (-8.4, -3.7)                       | < .001  |
| Day 14                                               | 0.2    | 9.9    | -9.7 (-12.6, -6.9)                      | < .001  |
| Day 21                                               | 0.2    | 7.8    | -7.6 (-10.2, -5.1)                      | < .001  |
| Day 35                                               | -0.3   | 5.0    | -5.3 (-7.7, -2.9)                       | < .001  |
| <b>Intact FGF23 (pg/ml)</b>                          |        |        |                                         |         |
| Day 1                                                | -3.9   | 98.4   | -102.2 (-119.1, -85.4)                  | < .001  |
| Day 7                                                | 12.8   | 51.3   | -38.6 (-53.4, -23.8)                    | < .001  |
| Day 8                                                | 7.8    | 282.2  | -274.4 (-320.1, -228.6)                 | < .001  |
| Day 14                                               | -6.6   | 92.1   | -98.7 (-119.2, -78.2)                   | < .001  |
| Day 21                                               | -5.2   | 61.4   | -66.6 (-84.8, -48.5)                    | < .001  |
| Day 35                                               | -8.3   | 20.1   | -28.4 (-39.1, -17.6)                    | < .001  |
| <b>C-terminal FGF23 (RU/ml)</b>                      |        |        |                                         |         |
| Day 1                                                | -688.4 | -606.0 | -82.4 (-122.1, -42.6)                   | < .001  |
| Day 7                                                | -704.3 | -682.9 | -21.4 (-50.2, 7.4)                      | .14     |
| Day 8                                                | -702.4 | -525.4 | -177.0 (-217.6, -136.4)                 | < .001  |
| Day 14                                               | -721.0 | -653.6 | -67.4 (-97.9, -36.9)                    | < .001  |
| Day 21                                               | -728.7 | -690.1 | -38.6 (-57.7, -19.5)                    | < .001  |
| Day 35                                               | -721.6 | -714.7 | -6.9 (-22.9, 9.2)                       | .40     |
| <b>Ionized calcium (mg/dl)</b>                       |        |        |                                         |         |
| Day 1                                                | 0.03   | 0.02   | 0.00 (-0.04, 0.05)                      | .87     |
| Day 7                                                | 0.03   | -0.04  | 0.07 (0.03, 0.12)                       | .003    |
| Day 8                                                | 0.03   | -0.03  | 0.06 (0.01, 0.10)                       | .01     |
| Day 14                                               | -0.02  | -0.08  | 0.05 (-0.03, 0.14)                      | .21     |
| Day 21                                               | 0.05   | -0.03  | 0.09 (0.04, 0.14)                       | < .001  |
| Day 35                                               | 0.02   | -0.03  | 0.05 (-0.00, 0.10)                      | .06     |
| <b>Parathyroid hormone (pg/ml)</b>                   |        |        |                                         |         |
| Day 1                                                | -0.9   | -2.8   | 1.9 (-3.0, 6.8)                         | .44     |
| Day 7                                                | -2.9   | 4.3    | -7.2 (-13.5, -1.0)                      | .02     |
| Day 8                                                | -0.1   | 0.1    | -0.3 (-6.7, 6.1)                        | .93     |
| Day 14                                               | 5.9    | 19.7   | -13.8 (-21.6, -6.0)                     | < .001  |
| Day 21                                               | -0.9   | 20.1   | -21.1 (-28.8, -13.4)                    | < .001  |
| Day 35                                               | -0.3   | 22.6   | -22.8 (-31.1, -14.6)                    | < .001  |

| Biochemical/bone marker                                 | IIM   | FCM   | Difference between IIM and FCM (95% CI) | P Value |
|---------------------------------------------------------|-------|-------|-----------------------------------------|---------|
| <b>25-Hydroxyvitamin D (ng/ml)</b>                      |       |       |                                         |         |
| Day 1                                                   | -0.2  | 0.0   | -0.2 (-0.8,0.4)                         | .46     |
| Day 7                                                   | 0.2   | -0.2  | 0.4 (-0.5,1.4)                          | .35     |
| Day 8                                                   | -0.2  | 0.3   | -0.6 (-1.6,0.5)                         | .30     |
| Day 14                                                  | -0.1  | -0.4  | 0.2 (-1.0,1.5)                          | .71     |
| Day 21                                                  | -0.4  | -0.4  | 0.0 (-1.3,1.3)                          | 1.0     |
| Day 35                                                  | -0.4  | -0.4  | -0.1 (-1.4,1.3)                         | .94     |
| <b>1,25-Dihydroxyvitamin D (pg/ml)</b>                  |       |       |                                         |         |
| Day 1                                                   | 4.8   | -18.3 | 23.1 (19.7,26.5)                        | < .001  |
| Day 7                                                   | -19.7 | -30.0 | 10.3 (4.7,15.8)                         | < .001  |
| Day 8                                                   | -15.8 | -35.7 | 19.8 (14.5,25.2)                        | < .001  |
| Day 14                                                  | -3.4  | -36.1 | 32.7 (27.9,37.6)                        | < .001  |
| Day 21                                                  | -2.9  | -25.3 | 22.4 (17.0,27.9)                        | < .001  |
| Day 35                                                  | -3.2  | -13.1 | 9.9 (4.7,15.1)                          | < .001  |
| <b>24,25-Dihydroxyvitamin D (ng/ml)</b>                 |       |       |                                         |         |
| Day 1                                                   | -0.00 | 0.11  | -0.11 (-0.23,0.01)                      | .07     |
| Day 7                                                   | 0.31  | 0.50  | -0.20 (-0.38,-0.01)                     | .04     |
| Day 8                                                   | 0.20  | 0.56  | -0.36 (-0.56,-0.15)                     | < .001  |
| Day 14                                                  | 0.12  | 0.77  | -0.65 (-0.86,-0.44)                     | < .001  |
| Day 21                                                  | 0.06  | 0.64  | -0.58 (-0.80,-0.36)                     | < .001  |
| Day 35                                                  | 0.02  | 0.44  | -0.43 (-0.66,-0.20)                     | < .001  |
| <b>Alkaline phosphatase (IU/l)</b>                      |       |       |                                         |         |
| Day 1                                                   | 0.4   | 0.9   | -0.5 (-2.7,1.7)                         | .64     |
| Day 7                                                   | 1.1   | 2.6   | -1.5 (-4.2,1.3)                         | .29     |
| Day 8                                                   | 1.8   | 5.2   | -3.4 (-6.3,-0.5)                        | .02     |
| Day 14                                                  | 0.3   | 5.3   | -5.0 (-8.8,-1.1)                        | .01     |
| Day 21                                                  | -0.7  | 7.5   | -8.2 (-13.4,-2.9)                       | .003    |
| Day 35                                                  | 1.4   | 8.6   | -7.1 (-11.5,-2.8)                       | .002    |
| <b>Bone-specific alkaline phosphatase (µg/l)</b>        |       |       |                                         |         |
| Day 1                                                   | 0.2   | 0.3   | -0.1 (-0.6,0.4)                         | .62     |
| Day 7                                                   | -0.2  | 0.4   | -0.6 (-1.0,-0.1)                        | .01     |
| Day 8                                                   | -0.1  | 1.0   | -1.1 (-1.7,-0.5)                        | < .001  |
| Day 14                                                  | -0.2  | 1.0   | -1.2 (-1.9,-0.4)                        | .002    |
| Day 21                                                  | -0.2  | 1.3   | -1.5 (-2.3,-0.8)                        | < .001  |
| Day 35                                                  | 0.2   | 2.2   | -2.0 (-2.7,-1.3)                        | < .001  |
| <b>N-terminal propeptide of Type I collagen (ng/ml)</b> |       |       |                                         |         |
| Day 1                                                   | -2.3  | -3.5  | 1.2 (-1.4,3.7)                          | .36     |
| Day 7                                                   | -8.5  | -11.2 | 2.7 (-0.2,5.7)                          | .07     |
| Day 8                                                   | -8.1  | -11.9 | 3.8 (0.8,6.7)                           | .01     |
| Day 14                                                  | -7.1  | -18.0 | 10.9 (7.5,14.2)                         | < .001  |
| Day 21                                                  | -3.8  | -16.3 | 12.5 (8.6,16.3)                         | < .001  |
| Day 35                                                  | -2.4  | -11.2 | 8.8 (4.5,13.1)                          | < .001  |
| <b>Carboxy-terminal collagen crosslinks (ng/ml)</b>     |       |       |                                         |         |
| Day 1                                                   | 0.04  | -0.02 | 0.07 (0.03,0.10)                        | < .001  |
| Day 7                                                   | -0.00 | -0.04 | 0.03 (0.00,0.07)                        | .04     |
| Day 8                                                   | 0.02  | -0.07 | 0.09 (0.06,0.12)                        | < .001  |
| Day 14                                                  | 0.01  | -0.06 | 0.07 (0.04,0.10)                        | < .001  |
| Day 21                                                  | 0.04  | -0.03 | 0.07 (0.04,0.10)                        | < .001  |
| Day 35                                                  | 0.03  | 0.01  | 0.02 (-0.02,0.06)                       | .23     |

Data presented are for the safety analysis set.

Estimates are derived from a mixed model for repeated measurements with treatment, day, treatment-by-day interaction, trial, and randomized strata as fixed effects, and baseline value and baseline value-by-day interactions as covariates.

CI, confidence interval; FCM, ferric carboxymaltose; FGF23, fibroblast growth factor; IIM, iron isomaltoside 1000/ferric derisomaltose.

**eTable 7. Secondary Efficacy End Points – Trial A, Trial B, and Pooled Data for Trial A and Trial B**

| End point                                                        |          | Day                   |                        |                         |                         |                         |                         |                         |
|------------------------------------------------------------------|----------|-----------------------|------------------------|-------------------------|-------------------------|-------------------------|-------------------------|-------------------------|
|                                                                  |          | 0                     | 1                      | 7                       | 8                       | 14                      | 21                      | 35                      |
|                                                                  |          | Mean (SD)<br>n        | Mean (SD)<br>n         | Mean (SD)<br>n          | Mean (SD)<br>n          | Mean (SD)<br>n          | Mean (SD)<br>n          | Mean (SD)<br>n          |
| <b>Trial A</b>                                                   |          |                       |                        |                         |                         |                         |                         |                         |
| Hemoglobin per gram of iron in actual dose (g/dl) <sup>a,b</sup> | IIM      | –                     | –0.3 (1.2)<br>(n=46)   | 0.6 (0.9)<br>(n=48)     | 0.5 (1.2)<br>(n=47)     | 1.5 (1.5)<br>(n=48)     | 1.6 (1.4)<br>(n=47)     | 2.1 (1.6)<br>(n=49)     |
|                                                                  | FCM      | –                     | 0.3 (2.0)<br>(n=42)    | 0.9 (1.6)<br>(n=47)     | 0.6 (0.8)<br>(n=45)     | 1.1 (0.9)<br>(n=45)     | 1.4 (0.9)<br>(n=46)     | 1.9 (1.0)<br>(n=45)     |
|                                                                  | <i>P</i> | –                     | <i>P</i> = .24         | <i>P</i> = .24          | <i>P</i> = .74          | <i>P</i> = .09          | <i>P</i> = .009         | <i>P</i> = .11          |
| Hemoglobin (g/dl)<br>(exploratory end point)                     | IIM      | 9.8 (1.3)<br>(n=62)   | 9.7 (1.2)<br>(n=54)    | 10.5 (0.9)<br>(n=54)    | 10.4 (0.8)<br>(n=54)    | 11.3 (1.1)<br>(n=53)    | 11.6 (0.8)<br>(n=53)    | 12.1 (1.0)<br>(n=56)    |
|                                                                  | FCM      | 9.6 (1.3)<br>(n=61)   | 9.8 (1.8)<br>(n=52)    | 10.3 (1.2)<br>(n=58)    | 10.6 (1.2)<br>(n=55)    | 11.4 (1.0)<br>(n=54)    | 11.9 (1.0)<br>(n=56)    | 12.5 (1.1)<br>(n=56)    |
|                                                                  | <i>P</i> | –                     | <i>P</i> = .37         | <i>P</i> = .73          | <i>P</i> = .12          | <i>P</i> = .46          | <i>P</i> = .24          | <i>P</i> = .01          |
| Ferritin (ng/ml)                                                 | IIM      | 15.7 (31.7)<br>(n=62) | 97.0 (52.0)<br>(n=58)  | 277.3 (173.2)<br>(n=59) | 264.8 (171.3)<br>(n=57) | 149.9 (98.4)<br>(n=57)  | 111.0 (122.3)<br>(n=55) | 63.4 (54.0)<br>(n=58)   |
|                                                                  | FCM      | 11.7 (29.4)<br>(n=61) | 108.1 (80.1)<br>(n=58) | 301.3 (170.4)<br>(n=59) | 337.5 (214.5)<br>(n=59) | 364.6 (216.1)<br>(n=57) | 191.3 (126.4)<br>(n=57) | 120.6 (103.3)<br>(n=59) |
|                                                                  | <i>P</i> | –                     | <i>P</i> = .19         | <i>P</i> = .56          | <i>P</i> = .05          | <i>P</i> < .001         | <i>P</i> = .001         | <i>P</i> < .001         |
| Transferrin saturation (%)                                       | IIM      | 16.6 (31.2)<br>(n=61) | 136.6 (41.9)<br>(n=58) | 27.4 (14.1)<br>(n=59)   | 24.1 (13.0)<br>(n=57)   | 22.2 (10.3)<br>(n=57)   | 22.3 (14.0)<br>(n=55)   | 20.8 (10.2)<br>(n=57)   |
|                                                                  | FCM      | 7.0 (6.7)<br>(n=60)   | 94.2 (36.1)<br>(n=58)  | 20.0 (12.5)<br>(n=59)   | 68.2 (40.0)<br>(n=59)   | 23.5 (9.1)<br>(n=57)    | 23.8 (9.9)<br>(n=56)    | 21.7 (9.3)<br>(n=59)    |
|                                                                  | <i>P</i> | –                     | <i>P</i> < .001        | <i>P</i> = .009         | <i>P</i> < .001         | <i>P</i> = .37          | <i>P</i> = .48          | <i>P</i> = .36          |
| <b>Trial B</b>                                                   |          |                       |                        |                         |                         |                         |                         |                         |
| Hemoglobin per gram of iron in actual dose (g/dl) <sup>a,b</sup> | IIM      | –                     | 0.2 (0.8)<br>(n=48)    | 1.0 (1.1)<br>(n=51)     | 1.1 (1.2)<br>(n=51)     | 1.7 (1.1)<br>(n=53)     | 1.9 (0.9)<br>(n=53)     | 2.2 (1.2)<br>(n=54)     |
|                                                                  | FCM      | –                     | 0.5 (1.2)<br>(n=47)    | 1.4 (1.1)<br>(n=51)     | 0.8 (0.7)<br>(n=51)     | 1.3 (0.9)<br>(n=53)     | 1.6 (0.9)<br>(n=54)     | 2.0 (0.9)<br>(n=53)     |
|                                                                  | <i>P</i> | –                     | <i>P</i> = .08         | <i>P</i> = .17          | <i>P</i> = .06          | <i>P</i> = .004         | <i>P</i> = .02          | <i>P</i> = .10          |
| Hemoglobin (g/dl)<br>(exploratory end point)                     | IIM      | 9.6 (1.2)<br>(n=61)   | 9.7 (1.4)<br>(n=54)    | 10.6 (1.5)<br>(n=57)    | 10.6 (1.5)<br>(n=56)    | 11.3 (1.3)<br>(n=56)    | 11.4 (1.2)<br>(n=56)    | 11.8 (1.4)<br>(n=57)    |
|                                                                  | FCM      | 9.3 (1.4)<br>(n=61)   | 9.6 (1.7)<br>(n=50)    | 10.4 (1.4)<br>(n=54)    | 10.5 (1.4)<br>(n=54)    | 11.3 (1.1)<br>(n=55)    | 11.8 (1.0)<br>(n=57)    | 12.3 (1.2)<br>(n=56)    |
|                                                                  | <i>P</i> | –                     | <i>P</i> = .23         | <i>P</i> = .99          | <i>P</i> = .66          | <i>P</i> = .42          | <i>P</i> = .003         | <i>P</i> = .001         |

| End point                                                        |          | Day                    |                         |                          |                          |                          |                          |                          |
|------------------------------------------------------------------|----------|------------------------|-------------------------|--------------------------|--------------------------|--------------------------|--------------------------|--------------------------|
|                                                                  |          | 0                      | 1                       | 7                        | 8                        | 14                       | 21                       | 35                       |
|                                                                  |          | Mean (SD)<br>n         | Mean (SD)<br>n          | Mean (SD)<br>n           | Mean (SD)<br>n           | Mean (SD)<br>n           | Mean (SD)<br>n           | Mean (SD)<br>n           |
| <b>Trial B (continued)</b>                                       |          |                        |                         |                          |                          |                          |                          |                          |
| Ferritin (ng/ml)                                                 | IIM      | 10.5 (13.4)<br>(n=61)  | 84.3 (82.9)<br>(n=60)   | 263.0 (165.4)<br>(n=60)  | 230.1 (150.4)<br>(n=58)  | 154.8 (101.8)<br>(n=57)  | 109.4 (95.1)<br>(n=56)   | 66.7 (74.2)<br>(n=57)    |
|                                                                  | FCM      | 17.9 (40.5)<br>(n=61)  | 101.1 (83.7)<br>(n=57)  | 297.9 (214.6)<br>(n=57)  | 332.5 (227.7)<br>(n=56)  | 398.2 (279.5)<br>(n=57)  | 251.3 (213.9)<br>(n=57)  | 144.9 (164.0)<br>(n=57)  |
|                                                                  | <i>P</i> | –                      | <i>P</i> = .66          | <i>P</i> = .49           | <i>P</i> = .01           | <i>P</i> < .001          | <i>P</i> < .001          | <i>P</i> = .004          |
| Transferrin saturation (%)                                       | IIM      | 8.4 (8.1)<br>(n=61)    | 132.3 (48.8)<br>(n=60)  | 23.5 (9.8)<br>(n=60)     | 20.9 (9.3)<br>(n=58)     | 18.9 (7.6)<br>(n=56)     | 19.2 (9.2)<br>(n=56)     | 18.3 (10.5)<br>(n=57)    |
|                                                                  | FCM      | 9.2 (10.0)<br>(n=59)   | 99.3 (33.1)<br>(n=56)   | 22.3 (28.6)<br>(n=57)    | 83.0 (29.3)<br>(n=56)    | 26.2 (12.1)<br>(n=57)    | 25.5 (9.8)<br>(n=56)     | 23.9 (11.3)<br>(n=56)    |
|                                                                  | <i>P</i> | –                      | <i>P</i> = .05          | <i>P</i> = .58           | <i>P</i> < .001          | <i>P</i> < .001          | <i>P</i> < .001          | <i>P</i> = .004          |
| <b>Pooled data for Trial A and Trial B</b>                       |          |                        |                         |                          |                          |                          |                          |                          |
| Hemoglobin per gram of iron in actual dose (g/dl) <sup>a,b</sup> | IIM      | –                      | –0.0 (1.1)<br>(n=94)    | 0.8 (1.0)<br>(n=99)      | 0.8 (1.2)<br>(n=98)      | 1.6 (1.3)<br>(n=101)     | 1.8 (1.2)<br>(n=100)     | 2.2 (1.4)<br>(n=103)     |
|                                                                  | FCM      | –                      | 0.4 (1.6)<br>(n=89)     | 1.2 (1.4)<br>(n=98)      | 0.7 (0.7)<br>(n=96)      | 1.2 (0.9)<br>(n=98)      | 1.5 (0.9)<br>(n=100)     | 2.0 (0.9)<br>(n=98)      |
|                                                                  | <i>P</i> | –                      | <i>P</i> = .01          | <i>P</i> = .09           | <i>P</i> = .08           | <i>P</i> < .001          | <i>P</i> < .001          | <i>P</i> = .02           |
| Hemoglobin (g/dl) (exploratory end point)                        | IIM      | 9.7 (1.3)<br>(n=123)   | 9.7 (1.3)<br>(n=108)    | 10.5 (1.2)<br>(n=111)    | 10.5 (1.2)<br>(n=110)    | 11.3 (1.2)<br>(n=109)    | 11.5 (1.0)<br>(n=109)    | 11.9 (1.2)<br>(n=113)    |
|                                                                  | FCM      | 9.5 (1.4)<br>(n=122)   | 9.7 (1.7)<br>(n=102)    | 10.3 (1.3)<br>(n=112)    | 10.6 (1.3)<br>(n=109)    | 11.3 (1.1)<br>(n=109)    | 11.8 (1.0)<br>(n=113)    | 12.4 (1.1)<br>(n=112)    |
|                                                                  | <i>P</i> | –                      | <i>P</i> = .08          | <i>P</i> = .72           | <i>P</i> = .24           | <i>P</i> = .50           | <i>P</i> = .003          | <i>P</i> < .001          |
| Ferritin (ng/ml)                                                 | IIM      | 13.1 (24.4)<br>(n=123) | 90.5 (69.4)<br>(n=118)  | 270.1 (168.7)<br>(n=119) | 247.3 (161.4)<br>(n=115) | 152.4 (99.7)<br>(n=114)  | 110.2 (108.9)<br>(n=111) | 65.0 (64.5)<br>(n=115)   |
|                                                                  | FCM      | 14.8 (35.4)<br>(n=122) | 104.6 (81.6)<br>(n=115) | 299.6 (192.6)<br>(n=116) | 335.1 (220.1)<br>(n=115) | 381.4 (249.3)<br>(n=114) | 221.3 (177.5)<br>(n=114) | 132.6 (136.5)<br>(n=116) |
|                                                                  | <i>P</i> | –                      | <i>P</i> = .25          | <i>P</i> = .27           | <i>P</i> < .001          | <i>P</i> < .001          | <i>P</i> < .001          | <i>P</i> < .001          |
| Transferrin saturation (%)                                       | IIM      | 12.5 (23.1)<br>(n=122) | 134.4 (45.4)<br>(n=118) | 25.4 (12.2)<br>(n=119)   | 22.5 (11.4)<br>(n=115)   | 20.6 (9.1)<br>(n=113)    | 20.7 (11.8)<br>(n=111)   | 19.5 (10.4)<br>(n=114)   |
|                                                                  | FCM      | 8.1 (8.5)<br>(n=119)   | 96.7 (34.6)<br>(n=114)  | 21.1 (21.9)<br>(n=116)   | 75.4 (35.8)<br>(n=115)   | 24.8 (10.7)<br>(n=114)   | 24.7 (9.8)<br>(n=112)    | 22.8 (10.3)<br>(n=115)   |
|                                                                  | <i>P</i> | –                      | <i>P</i> < .001         | <i>P</i> = .11           | <i>P</i> < .001          | <i>P</i> < .001          | <i>P</i> = .004          | <i>P</i> = .003          |

Data are presented for the randomized analysis set, unless otherwise stated as <sup>a</sup> all patients in the randomized data set, who received at least one dose of trial drug, had at least one post-baseline hemoglobin assessment, and who did not have a major protocol deviation. <sup>b</sup> Values are mean (SD) change in hemoglobin.

*P* values are for between-group comparisons from a mixed model for repeated measures analysis with treatment, day, treatment-by-day, trial (in the pooled analysis) and stratum as fixed effects and baseline value and baseline value-by-day, as covariates. FCM, ferric carboxymaltose; IIM, iron isomaltoside 1000/ferric derisomaltose; SD, standard deviation.

**eFigure 1.** Incidence of Hypophosphatemia (Serum Phosphate <2.0 mg/dl) Overall and Prevalence of Hypophosphatemia at Each Time Point – Pooled Data for Trial A and Trial B

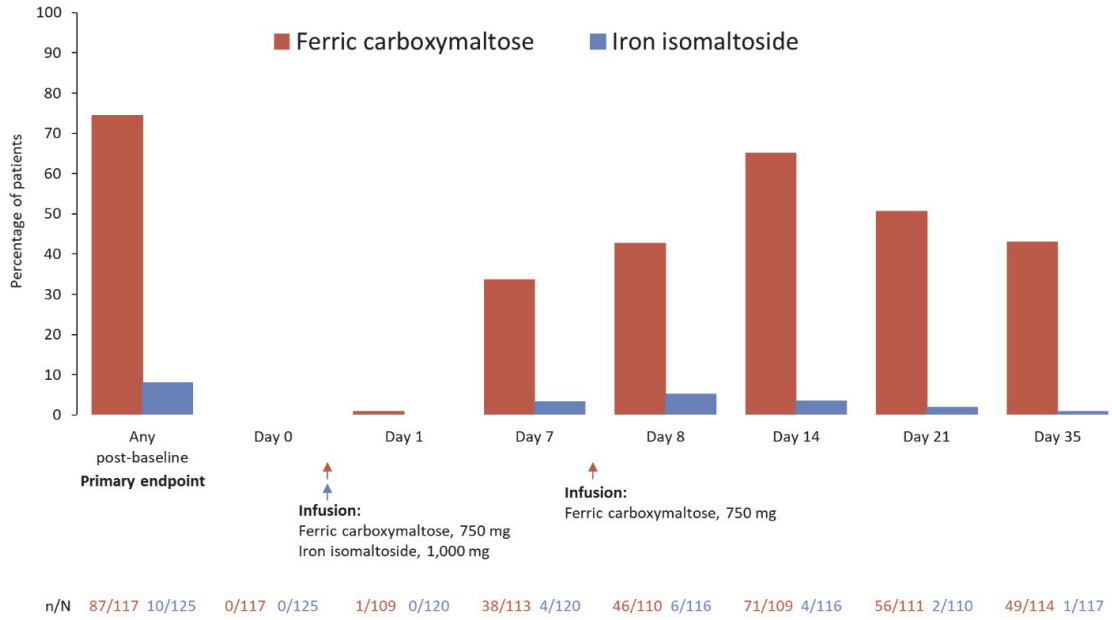

The leftmost columns correspond to the primary outcome of incident hypophosphatemia at any time during the trial. The remaining columns correspond to the proportions of patients with serum phosphate <2.0 mg/dl at each individual time point. Safety analysis set.

**eFigure 2.** Least Squares Mean Changes From Baseline in Biomarkers of Mineral and Bone Homeostasis According to Iron Treatment – Pooled Data for Trial A and Trial B

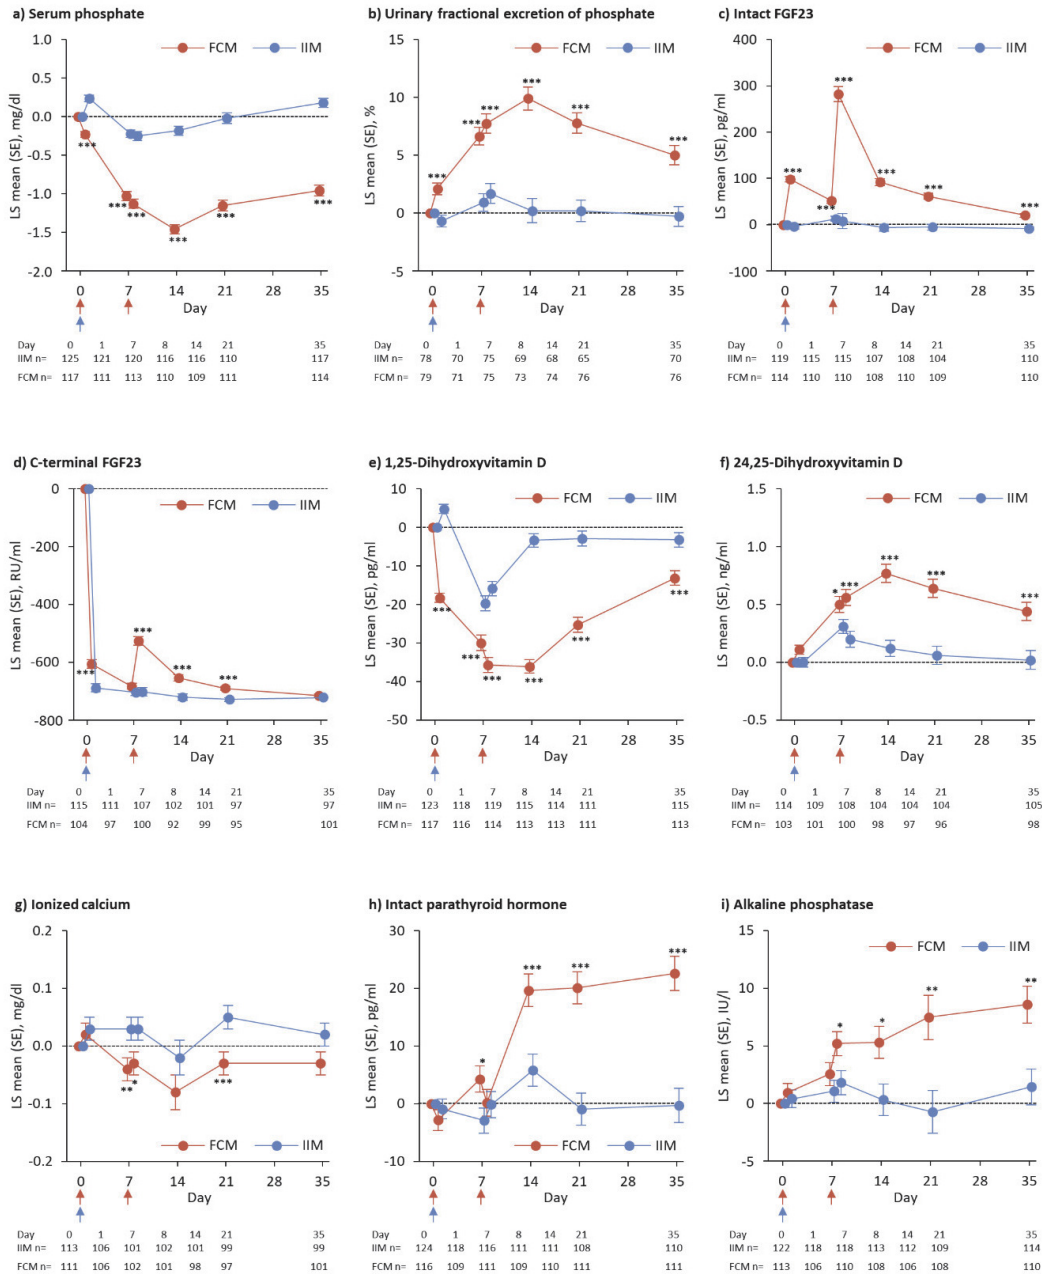

Red arrows indicate infusion of ferric carboxymaltose, 750 mg; blue arrows indicate infusion of iron isomaltoside, 1000 mg.  
 \* $P < .05$ , \*\* $P < .01$ , \*\*\* $P < .001$  between-group comparisons from a mixed model for repeated measures analysis with treatment, day, treatment-by-day, trial and stratum as fixed effects and baseline value and baseline value-by-day as covariates; safety analysis set.

FCM, ferric carboxymaltose; FGF23, fibroblast growth factor 23; IIM iron isomaltoside 1000/ferric derisomaltose; LS, least squares; SE, standard error.

**Figure 3.** Least Squares Mean Changes From Baseline in Iron Parameters – Pooled Data for Trial A and Trial B

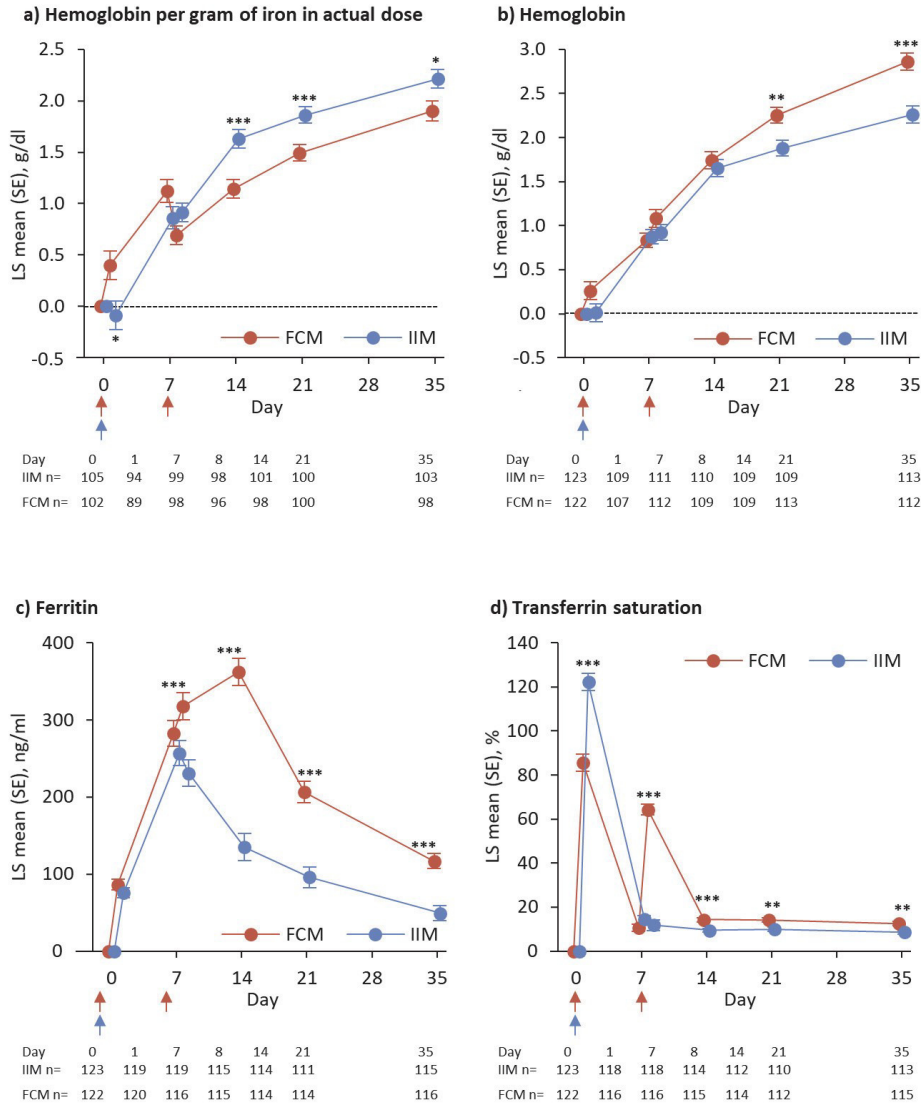

Red arrows indicate infusion of FCM, 750 mg; blue arrows indicate infusion of IIM, 1000 mg.

\* $P < .05$ , \*\* $P < .01$ , \*\*\* $P < .001$  between-group comparison from a mixed model for repeated measurements with treatment, day, treatment-by-day, trial and stratum as fixed effects, and baseline value and baseline value-by-day as covariates; randomized data set; part a) is all patients in the randomized data set, who received at least one dose of trial drug, had at least one post baseline hemoglobin assessment, and who did not have a major protocol deviation.

Transferrin saturation was calculated as:  $[\text{total serum iron } (\mu\text{mol/l}) * 5.586] / [\text{transferrin } (\text{g/l}) * 100] * 70.9$ . In accordance with the pharmacokinetics of IIM, on day 1 after the infusion of 1000 mg of the drug, when TSAT was  $>100\%$ , a proportion of the drug was still present in the circulation and this is also measured with the serum iron assay and causes the calculated TSAT to exceed  $100\%$ . FCM, ferric carboxymaltose; IIM iron isomaltoside 1000/ferric derisomaltose; LS, least squares; SE, standard error.



**Figure 4. Changes in Bone Turnover Markers – Pooled Data for Trial A and Trial B**

**a) Bone-specific alkaline phosphatase**

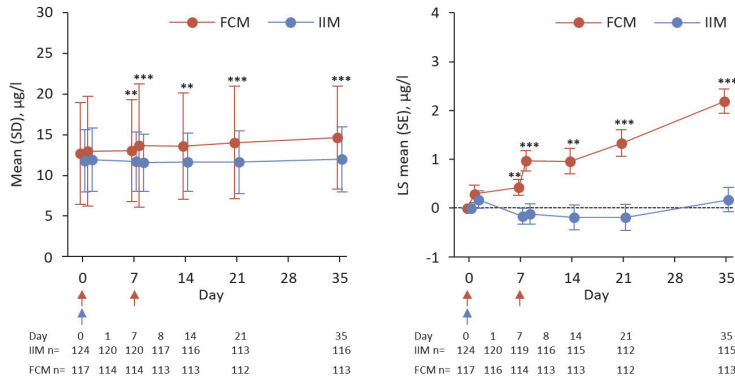

**b) N-terminal propeptide of Type I collagen**

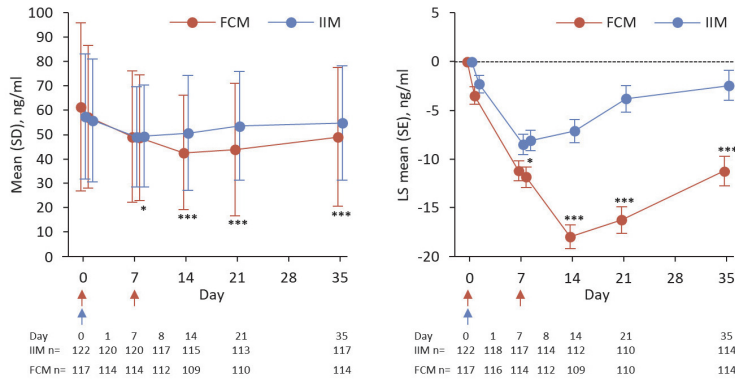

**c) Carboxy-terminal collagen crosslinks**

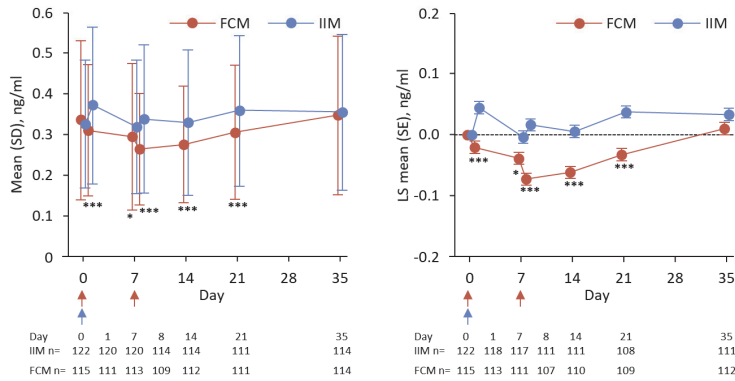

Left-hand figures show mean absolute values; right-hand figures show LS mean change from baseline values.

Red arrows indicate infusion of FCM, 750 mg; blue arrows indicate infusion of IIM, 1000 mg.

\* $P < .05$ , \*\* $P \leq .01$ , \*\*\* $P < .001$  between-group comparison from a mixed model for repeated measures analysis with treatment, day, treatment-by-day, trial and stratum as fixed effects and baseline value and baseline value-by-day as covariates; safety analysis set.

FCM, ferric carboxymaltose; IIM, iron isomaltoside 1000/ferric derisomaltose; LS, least squares; SD, standard deviation; SE, standard error.
