# Supplementary material
Source: PubMed Central journal article supplement (PMC7042864)
Supplement: jama-323-432-s005.pdf [file jama-323-432-s005.pdf]

## Data Sharing Statement

Wolf. Effects of Iron Isomaltoside vs Ferric Carboxymaltose on Hypophosphatemia in Iron-Deficiency Anemia. *JAMA*. Published February 04, 2020. 10.1001/jama.2019.22450

### Data

**Data available:** No
